# Supplementary material for: Altered Glycosylation in the Aging Heart
Source: Front Mol Biosci. 2021 May 28;8:673044. doi: 10.3389/fmolb.2021.673044 (PMC8194361; doi:10.3389/fmolb.2021.673044)
Supplement: Supplementary file 5 [file Table1.XLSX]

## Sheet: 13w
		13wt wt1	13wt wt2	13w wt3	13w wt4	13w wt5	13w wt6
	m/z	rel area	rel area	rel area	rel area	rel area	rel area
Hex3HexNAc2	1171.48	1.17536	0.765628	1.28661	1.13193	1.51042	1.0366
Fuc1Hex3HexNAc2	1345.55	0.692527	0.426931	0.569462	0.537624	0.557115	0.498259
Hex4HexNAc2 (Man4)	1375.62	1.91926	1.63593	1.93917	1.81509	2.24057	1.78186
Hex3HexNAc3	1416.64	1.21754	1.29017	1.81551	1.92999	2.5529	1.74046
Hex5HexNAc2 (Man5)	1579.78	12.3694	9.60375	7.63929	7.23908	7.24307	8.28081
Hex4HexNAc3	1620.72	1.31515	1.54988	1.72326	1.88174	1.20027	1.50655
Hex6HexNAc2 (Man6)	1783.88	15.0147	10.2205	7.05274	6.33916	7.39639	7.92317
NeuGc1Hex3HexNAc3	1807.8	2.18376	2.15273	3.50203	3.38168	3.94369	2.5923
Fuc1Hex3HexNAc4	1835.93	0.288076	0.155621	0.272731	0.237514	0.263957	0.197699
Hex4HexNAc4	1865.84	1.14832	1.51193	1.75264	1.79835	1.82047	1.53327
Hex7HexNAc2 (Man7)	1987.98	4.74729	3.2972	2.53004	2.2512	2.7592	2.35176
NeuGc1Hex4HexNAc3	2011.88	1.72771	2.20204	2.47196	2.08846	2.60628	1.70343
Hex6HexNAc3	2029.01	0.327925	0.375177	0.364885	0.335513	0.302439	0.371497
Fuc1Hex4HexNAc4	2040.03	0.165385	0.122195	0.203046	0.197715	0.191866	0.150126
Hex5HexNAc4	2070.04	0.716274	1.46499	1.26655	1.2586	1.16517	1.16479
Fuc1Hex3HexNAc5	2081.05	0.104891	0.0434041	0.0700524	0.0771771	0.0922755	0.0484719
Hex4HexNAc5	2111.06	0.138905	0.099088	0.19176	0.201693	0.328686	0.200584
Hex8HexNAc2 (Man8)	2192.08	2.90954	5.12834	3.08017	2.90476	3.26671	0.509275
Fuc1Hex5HexNAc4	2244.13	0.532426	0.593143	0.858907	0.697877	0.344958	2.90803
NeuGc1Hex4HexNAc4	2256.99	1.13607	1.25726	3.10322	3.11349	3.53091	0.0587258
Fuc1Hex4HexNAc5	2285.15	0.105685	0.0498401	0.0990051	0.107075	0.0869996	0.0587239
NeuAc1Hex6HexNAc3	2390.18	0.477734	0.561883	0.508833	0.439983	0.410176	0.333897
Hex9HexNAc2 (Man9)	2396.18	4.71593	6.44903	2.97592	2.0647	3.25022	3.26144
NeuAc1Hex5HexNAc4	2431.21	0.285356	0.290758	0.384951	0.316237	0.286873	0.210728
Fuc1Hex6HexNAc4	2448.22	1.16124	1.76693	2.05447	1.92746	0.664891	1.9262
NeuGc1Hex5HexNAc4	2461.22	14.4438	23.5691	16.3188	17.7597	17.1225	16.6538
Fuc1Hex5HexNAc5	2489.25	0.13311	0.115012	0.204287	0.202033	0.16628	0.130841
NeuAc1Fuc1Hex5HexNAc4	2605.30	0.130068	0.121226	0.215822	0.156727	0.115238	0.0820116
Fuc2Hex6HexNAc4	2622.31	0.138254	0.166137	0.301604	0.251419	0.194514	0.104335
NeuGc1Fuc1Hex5HexNAc4	2635.31	0.323839	0.350417	0.500498	0.383051	0.246876	0.237175
NeuAc1Hex6HexNAc4	2635.31
Fuc1Hex7HexNAc4	2652.32	0.15261	0.12595	0.1919	0.180807	0.160597	0.0873966
Fuc1Hex6HexNAc5	2693.35	0.074005	0.0974735	0.139998	0.150709	0.096672	0.0778552
NeuAc2Hex5HexNAc4	2792.38	0.186458	0.173026	0.254463	0.229909	0.178283	0.129528
NeuGc1Fuc2Hex5HexNAc4	2809.40	0.359877	0.438325	0.689736	0.745121	0.60064	0.318369
NeuAc1Fuc1Hex6HexNAc4	2809.40
NeuAc1NeuGc1Hex5HexNAc4	2822.39	0.377919	0.368838	0.357471	0.435501	0.403888	0.238646
NeuGc1Fuc1Hex6HexNAc4	2839.41	4.43816	3.04202	3.31669	3.707	1.16543	2.84595
NeuGc2Hex5HexNAc4	2852.40	19.1701	15.6173	26.7327	28.1678	28.338	34.5258
NeuAc1Hex6HexNAc5	2880.44	0.163607	0.115111	0.240097	0.236724	0.175532	0.104205
NeuGc1Fuc1Hex5HexNAc5	2880.44
NeuAc2Fuc1Hex5HexNAc4	2966.47	0.128357	0.0563248	0.146379	0.100438	0.0692839	0.0713003
NeuAc1NeuGc1Fuc1Hex5HexNAc4	2996.48	0.160928	0.0760324	0.134801	0.0977218	0.0585017	0.0532012
NeuGc2Fuc1Hex5HexNAc4	3026.49	0.482627	0.346341	0.331578	0.243672	0.166135	0.157233
Fuc1NeuAc1Hex6HexNAc5	3054.52	0.0298265	0.0340223	0.0816374	0.0634414	0.0633171	0.0517592
NeuGc1Fuc1Hex6HexNAc5	3084.54	0.0802468	0.05766	0.0846945	0.110319	0.0761296	0.0484469
NeuAc1Hex7HexNAc5	3084.54
NeuAc2Hex6HexNAc5	3241.61	0.0495276	0.030067	0.0547497	0.0683749	0.0640345	0.0347222
NeuGc3Hex5HexNAc4	3243.48	0.656873	0.546488	0.465053	0.549155	0.658904	0.29966
NeuAc1Fuc1Hex7HexNAc5	3258.62	0.115503	0.0800564	0.163153	0.184515	0.164133	0.0459127
NeuAc1NeuGc1Hex6HexNAc5	3271.62	0.0473286	0.0277884	0.0635539	0.0654759	0.0705457	0.0455585
NeuGc1Fuc1Hex7HexNAc5	3288.64	0.141255	0.149959	0.263661	0.335479	0.155171	0.199705
NeuGc2Hex6HexNAc5	3301.63	0.228187	0.467524	0.357368	0.467976	0.585952	0.301787
NeuAc2Fuc1Hex6HexNAc5	3415.70	0.0417327	0	0.0274643	0.0203878	0.0208762	0
NeuAc2Hex7HexNAc5	3445.71	0	0	0.0285114	0.0219643	0.0244294	0
NeuAc1Fuc1Hex8HexNAc5	3462.72	0.0338548	0.0282734	0.043899	0.0312529	0.0236329	0.0140796
NeuGc2Fuc1Hex6HexNAc5	3475.72	0.0308098	0.019829	0.0307257	0.0331973	0.0318058	0
NeuGc1Fuc1Hex8HexNAc5	3492.73	0.0253848	0.0167618	0.0295069	0.0169229	0.0132678	0.0349036
NeuAc1Fuc1Hex7HexNAc6	3503.75	0	0	0.0168671	0	0	0
NeuAc2Fuc1Hex7HexNAc5	3619.80	0.0320032	0.0129034	0.0388442	0.05083	0.0261826	0.0139031
NeuAc2NeuGc1Hex6HexNAc5	3632.79	0.0275584	0.0139414	0	0.0368839	0.0260922	0
NeuGc2Fuc2Hex6HexNAc5	3649.81	0.0755809	0.0280863	0.0661971	0.0916133	0.102662	0.0522128
NeuAc2Fuc1Hex6HexNAc6	3660.82	0.0116203	0.0222521	0	0	0.0481912	0
NeuAc1Fuc2Hex7HexNAc6	3677.84	0.031595	0.0278687	0.0431386	0.0438166	0.0390423	0.0277079
NeuGc3Hex6HexNAc5	3692.81	0.783903	0.591047	0.286495	0.439683	0.489268	0.618325
NeuAc3Fuc1Hex6HexNAc5	3776.87	0.062211	0.0129309	0	0.0189436	0.0217493	0.0150807
NeuAc2NeuGc1Fuc1Hex6HexNAc5	3806.88	0	0.0236183	0.0233696	0	0.0197199	0
NeuAc1NeuGc2Fuc1Hex6HexNAc5	3836.89	0.0548609	0	0.0120935	0.0273083	0	0.029894
NeuAc2Fuc1Hex7HexNAc6	3864.92	0	0.0127524	0.0249019	0	0	0
NeuAc2Hex8HexNAc6	3894.94	0	0.00311685	0	0	0	0

## Sheet: 22m
		22m wt1	22m wt238	22m wt239	22m wt249	22m wt251	22m wt252
	m/z	rel area	rel area	rel area	rel area	rel area	rel area
Hex3HexNAc2	1171.48	1.99744	1.78719	3.01402	1.92029	2.0015	1.8775
Fuc1Hex3HexNAc2	1345.55	0.838561	0.957616	1.39648	0.99504	1.21988	1.19257
Hex4HexNAc2 (Man4)	1375.62	3.59722	3.2343	5.46584	3.44634	3.69082	3.17293
Hex3HexNAc3	1416.64	2.07316	1.7671	2.87517	1.43288	1.42333	1.1962
Hex5HexNAc2	1579.78	13.5697	12.3023	17.7129	15.2489	16.8555	13.2788
Hex4HexNAc3	1620.72	1.99462	1.49099	3.37141	1.7618	0.818589	0.45114
Hex6HexNAc2	1783.88	11.9427	9.944	13.8013	15.3346	16.5557	12.8286
NeuGc1Hex3HexNAc3	1807.8	3.06102	2.99541	2.9265	2.24087	2.11483	2.59233
Fuc1Hex3HexNAc4	1835.93	0.340075	0.20662	0.309091	0.209094	0.270863	0.263725
Hex4HexNAc4	1865.84	1.66627	1.50622	2.57911	1.21024	1.1151	0.99035
Hex7HexNAc2	1987.98	3.27371	3.14606	4.0117	5.2593	4.82416	3.54032
NeuGc1Hex4HexNAc3	2011.88	2.09045	2.01199	2.09275	1.65799	1.3301	1.6959
Hex6HexNAc3	2029.01	0.353965	0.347683	0.446254	0.298333	0.308508	0.301803
Fuc1Hex4HexNAc4	2040.03	0.244881	0.19278	0.382312	0.163873	0.168538	0.212809
Hex5HexNAc4	2070.04	0.956481	1.00579	1.63651	0.822595	0.716927	0.519619
Fuc1Hex3HexNAc5	2081.05	0.0649461	0.0676789	0.0813329	0.073794	0.0743398	0.0905783
Hex4HexNAc5	2111.06	0.158695	0.144877	0.199949	0.132074	0.100241	0.100206
Hex8HexNAc2	2192.08	3.63011	3.30463	4.34873	6.86484	6.82227	4.67608
Fuc1Hex5HexNAc4	2244.13	0.464999	0.552681	0.656458	0.417336	0.458921	0.372497
NeuGc1Hex4HexNAc4	2256.99	0.903906	1.03133	1.12523	0.767465	0.696974	0.766239
Fuc1Hex4HexNAc5	2285.15	0.08279	0.0910711	0.136263	0.0926543	0.0756392	0.0663409
NeuAc1Hex6HexNAc3	2390.18	0.381246	0.459836	0.610126	0.456306	0.364756	0.346985
Hex9HexNAc2	2396.18	2.61933	3.60048	3.60097	3.69019	4.52499	2.77874
NeuAc1Hex5HexNAc4	2431.21	0.27457	0.299487	0.299343	0.260916	0.223927	0.219344
Fuc1Hex6HexNAc4	2448.22	0.966906	1.1032	1.07956	0.967482	0.817742	0.992276
NeuGc1Hex5HexNAc4	2461.22	11.3864	13.4588	14.4446	10.5455	9.37277	9.37342
Fuc1Hex5HexNAc5	2489.25	0.132368	0.145776	0.235822	0.0918811	0.0861285	0.113776
NeuAc1Fuc1Hex5HexNAc4	2605.30	0.0936579	0.155683	0.15884	0.12319	0.0909187	0.116937
Fuc2Hex6HexNAc4	2622.31	0.142513	0.148131	0.155837	0.156087	0.138931	0.125837
NeuGc1Fuc1Hex5HexNAc4	2635.31	0.222676	0.312308	0.274503	0.284035	0.293817	0.247128
NeuAc1Hex6HexNAc4	2635.31
Fuc1Hex7HexNAc4	2652.32	0.093922	0.109021	0.135142	0.114689	0.132402	0.084867
Fuc1Hex6HexNAc5	2693.35	0.08318	0.100486	0.14255	0.0669758	0.0773529	0.0574775
NeuAc2Hex5HexNAc4	2792.38	0.125981	0.168895	0.148833	0.138706	0.102323	0.122958
NeuGc1Fuc2Hex5HexNAc4	2809.40	0.329273	0.382562	0.400907	0.357786	0.213172	0.222358
NeuAc1Fuc1Hex6HexNAc4	2809.40
NeuAc1NeuGc1Hex5HexNAc4	2822.39	0.227014	0.259257	0.250822	0.210591	0.153681	0.208945
NeuGc1Fuc1Hex6HexNAc4	2839.41	2.28029	1.95875	1.44506	1.75415	1.56954	2.26029
NeuGc2Hex5HexNAc4	2852.40	24.4581	26.4875	6.49413	18.9958	18.7578	30.149
NeuAc1Hex6HexNAc5	2880.44	0.124378	0.192836	0.173475	0.122522	0.0708149	0.0908877
NeuGc1Fuc1Hex5HexNAc5	2880.44
NeuAc2Fuc1Hex5HexNAc4	2966.47	0.0837228	0.09111	0.0660495	0.0789981	0.0771138	0.0419277
NeuAc1NeuGc1Fuc1Hex5HexNAc4	2996.48	0.0571892	0.0849237	0.0571319	0.0699904	0.0710556	0.0834459
NeuGc2Fuc1Hex5HexNAc4	3026.49	0.156775	0.121657	0.147777	0.18676	0.171472	0.233036
Fuc1NeuAc1Hex6HexNAc5	3054.52	0.0403564	0.0526315	0.078683	0.0305652	0.030796	0.0377858
NeuGc1Fuc1Hex6HexNAc5	3084.54	0.0576438	0.0653161	0.0472399	0.040937	0.0441577	0.0658513
NeuAc1Hex7HexNAc5	3084.54
NeuAc2Hex6HexNAc5	3241.61	0.0452365	0	0	0.0294024	0.00768215	0.0430883
NeuGc3Hex5HexNAc4	3243.48	0.35633	0.4052	0.149761	0.156575	0.147413	0.252955
NeuAc1Fuc1Hex7HexNAc5	3258.62	0.0951368	0.112738	0.0611385	0.0500788	0.0438651	0.0617294
NeuAc1NeuGc1Hex6HexNAc5	3271.62	0.0571114	0.0741361	0.0535157	0.0380818	0	0.0449763
NeuGc1Fuc1Hex7HexNAc5	3288.64	0.223369	0.18634	0.105921	0.13344	0.0950364	0.146683
NeuGc2Hex6HexNAc5	3301.63	0.496173	0.408976	0.180109	0.202967	0.170514	0.280639
NeuAc2Fuc1Hex6HexNAc5	3415.70	0.0418311	0	0	0	0.0406538	0
NeuAc2Hex7HexNAc5	3445.71	0	0.0418581	0	0	0	0
NeuAc1Fuc1Hex8HexNAc5	3462.72	0.0201582	0	0.0315408	0	0.023225	0.0443442
NeuGc2Fuc1Hex6HexNAc5	3475.72	0.0236404	0.0226991	0	0	0.0114407	0.0417665
NeuGc1Fuc1Hex8HexNAc5	3492.73	0.0343745	0	0	0.0220129	0.0215471	0.0166833
NeuAc1Fuc1Hex7HexNAc6	3503.75	0	0.0177281	0	0	0	0
NeuAc2Fuc1Hex7HexNAc5	3619.80	0.0356972	0.039663	0.0304654	0	0	0
NeuAc2NeuGc1Hex6HexNAc5	3632.79	0.0255847	0.0488754	0	0.0199996	0.0357877	0
NeuGc2Fuc2Hex6HexNAc5	3649.81	0.0606028	0.0699566	0.0607907	0.0263381	0.0326332	0.0331634
NeuAc2Fuc1Hex6HexNAc6	3660.82	0	0.0401219	0.0262448	0.0201976	0	0.033891
NeuAc1Fuc2Hex7HexNAc6	3677.84	0.040476	0.0570235	0.036527	0.0213869	0.0254859	0.0283538
NeuGc3Hex6HexNAc5	3692.81	0.801124	0.547014	0.182088	0.143373	0.30053	0.718798
NeuAc3Fuc1Hex6HexNAc5	3776.87	0	0.055762	0.030507	0.0283101	0	0.0617849
NeuAc2NeuGc1Fuc1Hex6HexNAc5	3806.88	0	0	0.0346141	0	0.015708	0.0314456
NeuAc1NeuGc2Fuc1Hex6HexNAc5	3836.89	0	0	0	0	0	0
NeuAc2Fuc1Hex7HexNAc6	3864.92	0	0.0249192	0	0.0134834	0	0
NeuAc2Hex8HexNAc6	3894.94	0	0	0	0	0	0

## Sheet: 46w
		46wt wt1	46wt wt2	46wt wt3	46wt wt4	46wt wt5	46wt wt6
	m/z	rel area	rel area	rel area	rel area	rel area	rel area
Hex3HexNAc2	1171.48	1.92933	2.2851	2.58822	2.1683	1.57436	1.88659
Fuc1Hex3HexNAc2	1345.55	0.901072	0.987044	1.08736	0.97331	0.798428	0.809652
Hex4HexNAc2 (Man4)	1375.62	4.06607	4.12887	4.762	3.38972	2.73857	3.04934
Hex3HexNAc3	1416.64	2.38322	2.21652	2.40219	2.16583	1.8247	2.28181
Hex5HexNAc2	1579.78	16.0683	16.6667	16.8051	14.7404	13.2325	11.3695
Hex4HexNAc3	1620.72	2.16935	2.25453	2.41169	1.77867	1.9105	1.68367
Hex6HexNAc2	1783.88	16.0132	15.4297	13.914	11.9213	12.4409	9.85979
NeuGc1Hex3HexNAc3	1807.8	2.40164	3.28202	4.11126	3.32049	3.41828	3.66675
Fuc1Hex3HexNAc4	1835.93	0.24945	0.249477	0.285922	0.213834	0.206386	0.282023
Hex4HexNAc4	1865.84	2.48662	1.93784	2.10675	1.87147	1.65782	1.72279
Hex7HexNAc2	1987.98	5.37041	4.49268	4.06711	2.95927	3.36248	2.81544
NeuGc1Hex4HexNAc3	2011.88	2.08624	2.47005	2.60338	2.20674	2.40948	2.43371
Hex6HexNAc3	2029.01	0.489732	0.447261	0.434918	0.414494	0.373086	0.391367
Fuc1Hex4HexNAc4	2040.03	0.197848	0.229698	0.216903	0.195752	0.211607	0.220108
Hex5HexNAc4	2070.04	1.55495	1.08446	1.06288	1.12945	1.11671	1.16793
Fuc1Hex3HexNAc5	2081.05	0.0855082	0.0814284	0.073269	0.0814209	0.0900292	0.0791067
Hex4HexNAc5	2111.06	0.24283	0.136244	0.204293	0.182168	0.152194	0.237651
Hex8HexNAc2	2192.08	7.05684	5.8173	4.40964	3.39246	4.50739	3.1644
Fuc1Hex5HexNAc4	2244.13	0.694476	0.484032	0.549532	0.570748	0.701659	0.601012
NeuGc1Hex4HexNAc4	2256.99	1.13016	1.31278	1.28298	1.23685	1.29067	1.41144
Fuc1Hex4HexNAc5	2285.15	0.106566	0.0825774	0.101202	0.0993236	0.0661802	0.113202
NeuAc1Hex6HexNAc3	2390.18	0.524931	0.478947	0.427881	0.423543	0.43431	0.474783
Hex9HexNAc2	2396.18	5.49163	4.17027	3.91423	3.45893	3.02079	3.05456
NeuAc1Hex5HexNAc4	2431.21	0.305089	0.281224	0.272086	0.253901	0.242811	0.30438
Fuc1Hex6HexNAc4	2448.22	1.52986	1.15861	1.04681	1.21185	1.54795	1.50019
NeuGc1Hex5HexNAc4	2461.22	13.4087	13.9554	14.371	18.2062	18.0844	17.5467
Fuc1Hex5HexNAc5	2489.25	0.211056	0.149349	0.133104	0.182686	0.140064	0.20647
NeuAc1Fuc1Hex5HexNAc4	2605.30	0.150644	0.108965	0.132195	0.163642	0.110537	0.135302
Fuc2Hex6HexNAc4	2622.31	0.165494	0.142565	0.128579	0.169822	0.131311	0.166101
NeuGc1Fuc1Hex5HexNAc4	2635.31	0.28675	0.196194	0.244832	0.283396	0.287004	0.289122
NeuAc1Hex6HexNAc4	2635.31
Fuc1Hex7HexNAc4	2652.32	0.165229	0.100366	0.0971517	0.140463	0.109629	0.147523
Fuc1Hex6HexNAc5	2693.35	0.110477	0.0971716	0.100804	0.116849	0.0838498	0.116952
NeuAc2Hex5HexNAc4	2792.38	0.111936	0.139467	0.153943	0.130367	0.158282	0.206826
NeuGc1Fuc2Hex5HexNAc4	2809.40	0.389354	0.278211	0.436178	0.332487	0.409652	0.467537
NeuAc1Fuc1Hex6HexNAc4	2809.40
NeuAc1NeuGc1Hex5HexNAc4	2822.39	0.224089	0.226477	0.218804	0.297178	0.27863	0.352414
NeuGc1Fuc1Hex6HexNAc4	2839.41	2.09007	1.68393	1.51991	2.7722	4.01242	2.871
NeuGc2Hex5HexNAc4	2852.40	5.83608	9.568	9.48851	14.9627	14.5485	18.5205
NeuAc1Hex6HexNAc5	2880.44	0.141817	0.102581	0.141846	0.124289	0.133719	0.235519
NeuGc1Fuc1Hex5HexNAc5	2880.44
NeuAc2Fuc1Hex5HexNAc4	2966.47	0.0803559	0.0570022	0.0684354	0.0629954	0.09939	0.122669
NeuAc1NeuGc1Fuc1Hex5HexNAc4	2996.48	0.0800982	0.0495696	0.0449265	0.0835409	0.0664632	0.0949232
NeuGc2Fuc1Hex5HexNAc4	3026.49	0.105385	0.112034	0.172535	0.315075	0.231433	0.32488
Fuc1NeuAc1Hex6HexNAc5	3054.52	0.0603	0.0289353	0.0444029	0.0560355	0.0369006	0.0582812
NeuGc1Fuc1Hex6HexNAc5	3084.54	0.0457057	0.0585777	0.0442654	0.0430789	0.0723485	0.130612
NeuAc1Hex7HexNAc5	3084.54
NeuAc2Hex6HexNAc5	3241.61	0	0	0	0.0264581	0.0273855	0.0763212
NeuGc3Hex5HexNAc4	3243.48	0.137095	0.156296	0.235121	0.328858	0.411165	0.691265
NeuAc1Fuc1Hex7HexNAc5	3258.62	0.0676191	0.0329439	0.0726361	0.0875445	0.0716608	0.136568
NeuAc1NeuGc1Hex6HexNAc5	3271.62	0.0634866	0.0308901	0.0397499	0	0.0203075	0.066803
NeuGc1Fuc1Hex7HexNAc5	3288.64	0.121323	0.0543278	0.107365	0.131311	0.166291	0.243826
NeuGc2Hex6HexNAc5	3301.63	0.201821	0.131098	0.285981	0.285547	0.318292	0.568428
NeuAc2Fuc1Hex6HexNAc5	3415.70	0	0.0410043	0	0	0	0
NeuAc2Hex7HexNAc5	3445.71	0	0	0	0	0.020952	0
NeuAc1Fuc1Hex8HexNAc5	3462.72	0	0	0	0	0	0.0400965
NeuGc2Fuc1Hex6HexNAc5	3475.72	0.037551	0.0214355	0	0	0.0245664	0.0409565
NeuGc1Fuc1Hex8HexNAc5	3492.73	0.0188276	0	0	0	0	0
NeuAc1Fuc1Hex7HexNAc6	3503.75	0	0	0	0	0	0.017018
NeuAc2Fuc1Hex7HexNAc5	3619.80	0	0.0233166	0	0	0	0.0475283
NeuAc2NeuGc1Hex6HexNAc5	3632.79	0	0.0182982	0	0	0	0
NeuGc2Fuc2Hex6HexNAc5	3649.81	0.0346305	0	0.0548879	0	0	0.0604079
NeuAc2Fuc1Hex6HexNAc6	3660.82	0	0	0.0298033	0	0	0
NeuAc1Fuc2Hex7HexNAc6	3677.84	0	0.0128298	0.0386728	0	0.0397679	0.0570743
NeuGc3Hex6HexNAc5	3692.81	0.0944818	0.242655	0.343355	0.337019	0.49344	1.37921
NeuAc3Fuc1Hex6HexNAc5	3776.87	0.0243338	0	0.0397223	0	0.0292315	0
NeuAc2NeuGc1Fuc1Hex6HexNAc5	3806.88	0	0	0	0	0.0390208	0
NeuAc1NeuGc2Fuc1Hex6HexNAc5	3836.89	0	0	0.0315479	0	0.0135433	0
NeuAc2Fuc1Hex7HexNAc6	3864.92	0	0.0147435	0	0	0	0
NeuAc2Hex8HexNAc6	3894.94	0	0	0.0381183	0	0	0

## Sheet: 70w
		70wt wt1	70wt wt2	70wt wt3	70wt wt4	70wt wt5	70wt wt6
	m/z	rel area	rel area	rel area	rel area	rel area	rel area
Hex3HexNAc2	1171.48	2.08845	2.36918	2.24202	2.33586	1.59959	2.34889
Fuc1Hex3HexNAc2	1345.55	0.984994	1.14867	1.1992	0.983766	0.929401	1.23088
Hex4HexNAc2 (Man4)	1375.62	3.57083	3.80969	3.65824	3.60038	3.2268	4.2512
Hex3HexNAc3	1416.64	2.66936	2.5712	2.6016	3.2531	1.88912	2.91999
Hex5HexNAc2	1579.78	11.4438	12.6273	13.3034	12.9813	14.9456	16.0312
Hex4HexNAc3	1620.72	2.16607	1.08591	2.31974	2.72246	1.78171	1.09073
Hex6HexNAc2	1783.88	9.87939	10.3059	10.2495	9.34133	14.0648	12.3908
NeuGc1Hex3HexNAc3	1807.8	3.94964	4.33384	3.36302	4.58325	2.92381	4.34619
Fuc1Hex3HexNAc4	1835.93	0.349987	0.378924	0.392449	0.440678	0.248064	0.30511
Hex4HexNAc4	1865.84	2.59692	2.46005	2.27426	0	1.8519	2.36694
Hex7HexNAc2	1987.98	3.72102	3.47787	3.10162	3.05181	4.53701	3.75266
NeuGc1Hex4HexNAc3	2011.88	2.40782	3.1829	2.11721	3.15998	2.22627	2.69825
Hex6HexNAc3	2029.01	0.673385	0.512999	0.450162	0.565315	0.369466	0.53927
Fuc1Hex4HexNAc4	2040.03	0.289231	0.312247	0.368125	0.418599	0.365894	0.316417
Hex5HexNAc4	2070.04	1.74043	1.56636	1.54133	2.08515	1.29626	1.47813
Fuc1Hex3HexNAc5	2081.05	0.14955	0.127764	0.0884027	0.0660528	0.0555756	0.0939252
Hex4HexNAc5	2111.06	0.20959	0.420576	0.280232	0.222213	0.152035	0.243002
Hex8HexNAc2	2192.08	3.6299	3.33476	3.35304	3.08598	5.86039	3.65189
Fuc1Hex5HexNAc4	2244.13	0.636523	0.71716	0.7396	1.03978	0.693035	0.689289
NeuGc1Hex4HexNAc4	2256.99	1.52096	1.61568	1.27762	1.68427	1.1969	1.31021
Fuc1Hex4HexNAc5	2285.15	0.194946	0.178314	0.0919668	0.161162	0.0706331	0.128744
NeuAc1Hex6HexNAc3	2390.18	0.60109	0.618593	0.526432	0.601055	0.46839	0.517193
Hex9HexNAc2	2396.18	2.52221	2.59728	3.39099	2.55448	3.82526	4.50492
NeuAc1Hex5HexNAc4	2431.21	0.361597	0.387783	0.329462	0.521443	0.253139	0.287427
Fuc1Hex6HexNAc4	2448.22	1.99065	1.62266	1.90652	2.50759	1.60689	1.7537
NeuGc1Hex5HexNAc4	2461.22	20.9752	19.898	18.9491	21.2944	17.1765	15.9507
Fuc1Hex5HexNAc5	2489.25	0.37141	0.26972	0.237323	0.241561	0.123694	0.172014
NeuAc1Fuc1Hex5HexNAc4	2605.30	0.156808	0.203899	0.157556	0.169164	0.105344	0.15794
Fuc2Hex6HexNAc4	2622.31	0.222859	0.286425	0.206049	0.25315	0.130971	0.232028
NeuGc1Fuc1Hex5HexNAc4	2635.31	0.283633	0.422668	0.308413	0.310042	0.324236	0.29737
NeuAc1Hex6HexNAc4	2635.31
Fuc1Hex7HexNAc4	2652.32	0.186301	0.226123	0.142556	0.178626	0.135226	0.14342
Fuc1Hex6HexNAc5	2693.35	0.261295	0.170306	0.116082	0.168089	0.0848327	0.113974
NeuAc2Hex5HexNAc4	2792.38	0.240427	0.291129	0.191545	0.313411	0.12037	0.172166
NeuGc1Fuc2Hex5HexNAc4	2809.40	0.652936	0.721287	0.538506	0.640555	0.34876	0.4433
NeuAc1Fuc1Hex6HexNAc4	2809.40
NeuAc1NeuGc1Hex5HexNAc4	2822.39	0.385656	0.47921	0.24976	0.38977	0.204853	0.27399
NeuGc1Fuc1Hex6HexNAc4	2839.41	2.69538	2.71344	2.9599	3.0884	2.79245	2.67569
NeuGc2Hex5HexNAc4	2852.40	10.3623	9.96393	11.4786	9.75579	10.5687	8.0077
NeuAc1Hex6HexNAc5	2880.44	0.309117	0.276773	0.242851	0.181035	0.0931466	0.141077
NeuGc1Fuc1Hex5HexNAc5	2880.44
NeuAc2Fuc1Hex5HexNAc4	2966.47	0.0943374	0.100421	0.147499	0.0394456	0.0519365	0.058526
NeuAc1NeuGc1Fuc1Hex5HexNAc4	2996.48	0.115271	0.105026	0.201098	0.065579	0.062605	0.0965399
NeuGc2Fuc1Hex5HexNAc4	3026.49	0.158556	0.205306	0.257589	0.110004	0.204682	0.168276
Fuc1NeuAc1Hex6HexNAc5	3054.52	0.0619408	0.0825867	0.0423304	0.0577042	0.0214292	0.046878
NeuGc1Fuc1Hex6HexNAc5	3084.54	0.0977516	0.0693819	0.115597	0	0.028803	0.0676925
NeuAc1Hex7HexNAc5	3084.54
NeuAc2Hex6HexNAc5	3241.61	0	0.0918808	0.0888524	0	0.0233283	0.032233
NeuGc3Hex5HexNAc4	3243.48	0.404622	0.350009	0.320354	0.147921	0.194441	0.256881
NeuAc1Fuc1Hex7HexNAc5	3258.62	0.150765	0.142347	0.087288	0.0533331	0.0414113	0.0838907
NeuAc1NeuGc1Hex6HexNAc5	3271.62	0	0.0913831	0	0.0410879	0.0202501	0.0594278
NeuGc1Fuc1Hex7HexNAc5	3288.64	0.168518	0.170374	0.284081	0.132255	0.10053	0.231546
NeuGc2Hex6HexNAc5	3301.63	0.34705	0.302599	0.465165	0.133	0.202556	0.284501
NeuAc2Fuc1Hex6HexNAc5	3415.70	0	0	0.0546434	0	0.0122558	0.0154126
NeuAc2Hex7HexNAc5	3445.71	0	0	0.119387	0.0254085	0	0.0386049
NeuAc1Fuc1Hex8HexNAc5	3462.72	0.0935308	0.0294235	0	0	0.0117648	0
NeuGc2Fuc1Hex6HexNAc5	3475.72	0	0.0161882	0.0754695	0.0333469	0.0180863	0
NeuGc1Fuc1Hex8HexNAc5	3492.73	0	0	0	0	0.0220752	0
NeuAc1Fuc1Hex7HexNAc6	3503.75	0	0	0	0	0	0
NeuAc2Fuc1Hex7HexNAc5	3619.80	0.0958107	0.0579154	0.0571259	0	0	0.0553063
NeuAc2NeuGc1Hex6HexNAc5	3632.79	0.0917809	0.0329753	0	0	0	0
NeuGc2Fuc2Hex6HexNAc5	3649.81	0.0764014	0.0887181	0.0801492	0.0556824	0.0268182	0.0629112
NeuAc2Fuc1Hex6HexNAc6	3660.82	0.0970416	0	0	0	0	0
NeuAc1Fuc2Hex7HexNAc6	3677.84	0.234073	0.0449996	0.031047	0	0.0292457	0.0493024
NeuGc3Hex6HexNAc5	3692.81	0.0795271	0.263198	0.627957	0.120995	0.269439	0.313509
NeuAc3Fuc1Hex6HexNAc5	3776.87	0	0	0	0.0332565	0.011364	0.0501533
NeuAc2NeuGc1Fuc1Hex6HexNAc5	3806.88	0.0614595	0.0329383	0	0	0	0
NeuAc1NeuGc2Fuc1Hex6HexNAc5	3836.89	0	0	0	0	0	0
NeuAc2Fuc1Hex7HexNAc6	3864.92	0.0558408	0	0	0	0	0
NeuAc2Hex8HexNAc6	3894.94	0.0640804	0.0358813	0	0	0	0

## Sheet: Area calculations
		13wt wt1		13wt wt2		13w wt3		13w wt4		13w wt5		13w wt6		22m wt1		22m wt238		22m wt239		22m wt249		22m wt251		22m wt252		46wt wt1		46wt wt2		46w wt3		46w wt4		46w wt5		46w wt6		70wt wt1		70wt wt2		70wt wt3		70wt wt4		70wt wt5		70wt wt6
	m/z	area	rel area	area	rel area	area	rel area	area	rel area	area	rel area	area	rel area	area	rel area	area	rel area	area	rel area	area	rel area	area	rel area	area	rel area	area	rel area	area	rel area	area	rel area	area	rel area	area	rel area	area	rel area	area	rel area	area	rel area	area	rel area	area	rel area	area	rel area	area	rel area
Hex3HexNAc2	1171.48	264.741	1.17536	511.676	0.765628	514.968	1.28661	443.752	1.13193	854.857	1.51042	211.419	1.0366	518.642	1.99744	314.648	1.78719	400.253	3.01402	600.93	1.92029	476.462	2.0015	342.371	1.8775	296.224	1.92933	429.306	2.2851	553.235	2.58822	313.757	2.1683	373.291	1.57436	323.444	1.88659	104.523	2.08845	613.377	2.36918	170.614	2.24202	404.08	2.33586	1010.13	1.59959	462.378	2.34889
Fuc1Hex3HexNAc2	1345.55	155.987	0.692527	285.322	0.426931	227.928	0.569462	210.765	0.537624	315.311	0.557115	101.622	0.498259	217.735	0.838561	168.595	0.957616	185.449	1.39648	311.385	0.99504	290.395	1.21988	217.47	1.19257	138.348	0.901072	185.437	0.987044	232.424	1.08736	140.84	0.97331	189.312	0.798428	138.81	0.809652	49.2971	0.984994	297.39	1.14867	91.2571	1.1992	170.181	0.983766	586.907	0.929401	242.299	1.23088
Hex4HexNAc2 (Man4)	1375.62	432.301	1.91926	1093.31	1.63593	776.154	1.93917	711.572	1.81509	1268.1	2.24057	363.419	1.78186	934.03	3.59722	569.42	3.2343	725.848	5.46584	1078.49	3.44634	878.607	3.69082	578.6	3.17293	624.293	4.06607	775.696	4.12887	1017.88	4.762	490.5	3.38972	649.332	2.73857	522.79	3.04934	178.714	3.57083	986.325	3.80969	278.386	3.65824	622.829	3.60038	2037.7	3.2268	836.848	4.2512
Hex3HexNAc3	1416.64	274.243	1.21754	862.23	1.29017	726.662	1.81551	756.616	1.92999	1444.87	2.5529	354.975	1.74046	538.303	2.07316	311.11	1.7671	381.814	2.87517	448.402	1.43288	338.827	1.42333	218.133	1.1962	365.913	2.38322	416.421	2.21652	513.471	2.40219	313.4	2.16583	432.649	1.8247	391.203	2.28181	133.597	2.66936	665.68	2.5712	197.977	2.6016	562.754	3.2531	1192.96	1.88912	574.8	2.91999
Hex5HexNAc2	1579.78	2786.12	12.3694	6418.28	9.60375	3057.64	7.63929	2837.95	7.23908	4099.37	7.24307	1688.91	8.28081	3523.42	13.5697	2165.91	12.3023	2352.23	17.7129	4771.94	15.2489	4012.5	16.8555	2421.45	13.2788	2467.08	16.0683	3131.19	16.6667	3592.13	16.8051	2132.97	14.7404	3137.52	13.2325	1949.23	11.3695	572.741	11.4438	3269.19	12.6273	1012.37	13.3034	2245.63	12.9813	9437.98	14.9456	3155.74	16.0312
Hex4HexNAc3	1620.72	296.227	1.31515	1035.8	1.54988	689.737	1.72326	737.703	1.88174	679.316	1.20027	307.268	1.50655	517.909	1.99462	262.499	1.49099	447.713	3.37141	551.332	1.7618	194.867	0.818589	82.2676	0.45114	333.075	2.16935	423.562	2.25453	515.502	2.41169	257.377	1.77867	452.991	1.9105	288.654	1.68367	108.408	2.16607	281.141	1.08591	176.528	2.31974	470.957	2.72246	1125.13	1.78171	214.711	1.09073
Hex6HexNAc2	1783.88	3381.95	15.0147	6830.45	10.2205	2822.87	7.05274	2485.15	6.33916	4186.15	7.39639	1615.96	7.92317	3100.96	11.9427	1750.71	9.944	1832.78	13.8013	4798.76	15.3346	3941.12	16.5557	2339.35	12.8286	2458.61	16.0132	2898.81	15.4297	2974.15	13.914	1725.04	11.9213	2949.82	12.4409	1690.4	9.85979	494.445	9.87939	2668.18	10.3059	779.972	10.2495	1615.95	9.34133	8881.77	14.0648	2439.14	12.3908
NeuGc1Hex3HexNAc3	1807.8	491.877	2.18376	1438.69	2.15273	1401.69	3.50203	1325.72	3.38168	2232.02	3.94369	528.71	2.5923	794.804	3.06102	527.363	2.99541	388.631	2.9265	701.253	2.24087	503.438	2.11483	472.724	2.59233	368.74	2.40164	616.597	3.28202	878.788	4.11126	480.482	3.32049	810.496	3.41828	628.642	3.66675	197.672	3.94964	1122.03	4.33384	255.92	3.36302	792.856	4.58325	1846.36	2.92381	855.547	4.34619
Fuc1Hex3HexNAc4	1835.93	64.8872	0.288076	104.003	0.155621	109.161	0.272731	93.113	0.237514	149.392	0.263957	40.3216	0.197699	88.3015	0.340075	36.3769	0.20662	41.0463	0.309091	65.4333	0.209094	64.4795	0.270863	48.0915	0.263725	38.2998	0.24945	46.8696	0.249477	61.1162	0.285922	30.9422	0.213834	48.9355	0.206386	48.3512	0.282023	17.5162	0.349987	98.1031	0.378924	29.8647	0.392449	76.2327	0.440678	156.65	0.248064	60.0608	0.30511
Hex4HexNAc4	1865.84	258.651	1.14832	1010.44	1.51193	701.495	1.75264	705.008	1.79835	1030.34	1.82047	312.717	1.53327	432.652	1.66627	265.18	1.50622	342.499	2.57911	378.728	1.21024	265.451	1.1151	180.595	0.99035	381.788	2.48662	364.065	1.93784	450.32	2.10675	270.805	1.87147	393.079	1.65782	295.362	1.72279	129.971	2.59692	636.905	2.46005	173.068	2.27426	0	0	1169.45	1.8519	465.931	2.36694
Hex7HexNAc2	1987.98	1069.29	4.74729	2203.55	3.2972	1012.65	2.53004	882.543	2.2512	1561.63	2.7592	479.652	2.35176	850.029	3.27371	553.886	3.14606	532.742	4.0117	1645.83	5.2593	1148.4	4.82416	645.595	3.54032	824.557	5.37041	844.046	4.49268	869.351	4.06711	428.213	2.95927	797.265	3.36248	482.691	2.81544	186.23	3.72102	900.416	3.47787	236.028	3.10162	527.931	3.05181	2865.08	4.53701	738.711	3.75266
NeuGc1Hex4HexNAc3	2011.88	389.155	1.72771	1471.64	2.20204	989.404	2.47196	818.742	2.08846	1475.08	2.60628	347.422	1.70343	542.793	2.09045	354.224	2.01199	277.911	2.09275	518.847	1.65799	316.632	1.3301	309.256	1.6959	320.314	2.08624	464.052	2.47005	556.476	2.60338	319.32	2.20674	571.303	2.40948	417.245	2.43371	120.507	2.40782	824.048	3.1829	161.116	2.11721	546.644	3.15998	1405.87	2.22627	531.15	2.69825
Hex6HexNAc3	2029.01	73.8629	0.327925	250.734	0.375177	146.046	0.364885	131.532	0.335513	171.172	0.302439	75.7684	0.371497	91.9081	0.353965	61.212	0.347683	59.2612	0.446254	93.3594	0.298333	73.441	0.308508	55.0353	0.301803	75.1921	0.489732	84.0275	0.447261	92.9643	0.434918	59.9782	0.414494	88.4611	0.373086	67.0975	0.391367	33.7017	0.673385	132.815	0.512999	34.2566	0.450162	97.7937	0.565315	233.314	0.369466	106.155	0.53927
Fuc1Hex4HexNAc4	2040.03	37.2518	0.165385	81.6638	0.122195	81.2695	0.203046	77.5105	0.197715	108.591	0.191866	30.6189	0.150126	63.584	0.244881	33.9403	0.19278	50.7699	0.382312	51.282	0.163873	40.1208	0.168538	38.8069	0.212809	30.377	0.197848	43.1536	0.229698	46.3634	0.216903	28.3257	0.195752	50.1733	0.211607	37.7361	0.220108	14.4755	0.289231	80.8403	0.312247	28.0137	0.368125	72.4134	0.418599	231.058	0.365894	62.2866	0.316417
Hex5HexNAc4	2070.04	161.336	0.716274	979.067	1.46499	506.94	1.26655	493.412	1.2586	659.452	1.16517	237.563	1.16479	248.353	0.956481	177.077	1.00579	217.323	1.63651	257.42	0.822595	170.666	0.716927	94.7552	0.519619	238.743	1.55495	203.74	1.08446	227.192	1.06288	163.434	1.12945	264.779	1.11671	200.234	1.16793	87.1051	1.74043	405.529	1.56636	117.293	1.54133	360.71	2.08515	818.578	1.29626	290.97	1.47813
Fuc1Hex3HexNAc5	2081.05	23.626	0.104891	29.0074	0.0434041	28.0386	0.0700524	30.2559	0.0771771	52.2253	0.0922755	9.88606	0.0484719	16.8635	0.0649461	11.9153	0.0676789	10.8008	0.0813329	23.0929	0.073794	17.6967	0.0743398	16.5174	0.0905783	13.1287	0.0855082	15.2981	0.0814284	15.6614	0.073269	11.7818	0.0814209	21.3465	0.0900292	13.5624	0.0791067	7.48472	0.14955	33.078	0.127764	6.7273	0.0884027	11.4265	0.0660528	35.0954	0.0555756	18.4892	0.0939252
Hex4HexNAc5	2111.06	31.2875	0.138905	66.2215	0.099088	76.7522	0.19176	79.07	0.201693	186.027	0.328686	40.91	0.200584	41.2056	0.158695	25.5066	0.144877	26.5527	0.199949	41.3308	0.132074	23.8625	0.100241	18.273	0.100206	37.2834	0.24283	25.5963	0.136244	43.668	0.204293	26.3601	0.182168	36.0862	0.152194	40.7438	0.237651	10.4896	0.20959	108.887	0.420576	21.3252	0.280232	38.4406	0.222213	96.0085	0.152035	47.8348	0.243002
Hex8HexNAc2	2192.08	655.354	2.90954	3427.32	5.12834	1232.84	3.08017	1138.76	2.90476	1848.87	3.26671	103.869	0.509275	942.57	3.63011	581.803	3.30463	577.499	4.34873	2148.26	6.86484	1624.05	6.82227	852.705	4.67608	1083.49	7.05684	1092.9	5.8173	942.567	4.40964	490.897	3.39246	1068.73	4.50739	542.518	3.1644	181.67	3.6299	863.366	3.33476	255.161	3.35304	533.843	3.08598	3700.78	5.86039	718.875	3.65189
Fuc1Hex5HexNAc4	2244.13	119.925	0.532426	396.403	0.593143	343.779	0.858907	273.59	0.697877	195.237	0.344958	593.105	2.90803	120.739	0.464999	97.3034	0.552681	87.1757	0.656458	130.6	0.417336	109.247	0.458921	67.9266	0.372497	106.628	0.694476	90.9357	0.484032	117.463	0.549532	82.5884	0.570748	166.368	0.701659	103.04	0.601012	31.8568	0.636523	185.672	0.71716	56.2823	0.7396	179.871	1.03978	437.645	0.693035	135.686	0.689289
NeuGc1Hex4HexNAc4	2256.99	255.893	1.13607	840.236	1.25726	1242.07	3.10322	1220.59	3.11349	1998.4	3.53091	11.9774	0.0587258	234.702	0.903906	181.572	1.03133	149.428	1.12523	240.168	0.767465	165.916	0.696974	139.728	0.766239	173.522	1.13016	246.633	1.31278	274.24	1.28298	178.975	1.23685	306.027	1.29067	241.984	1.41144	76.1212	1.52096	418.297	1.61568	97.2245	1.27762	291.361	1.68427	755.829	1.1969	257.914	1.31021
Fuc1Hex4HexNAc5	2285.15	23.8049	0.105685	33.3086	0.0498401	39.6269	0.0990051	41.9768	0.107075	49.2393	0.0869996	11.977	0.0587239	21.4967	0.08279	16.0337	0.0910711	18.0953	0.136263	28.995	0.0926543	18.0061	0.0756392	12.0976	0.0663409	16.3619	0.106566	15.5139	0.0825774	21.6321	0.101202	14.3723	0.0993236	15.6917	0.0661802	19.4078	0.113202	9.75667	0.194946	46.1652	0.178314	6.99851	0.0919668	27.8793	0.161162	44.6041	0.0706331	25.3432	0.128744
NeuAc1Hex6HexNAc3	2390.18	107.606	0.477734	375.512	0.561883	203.661	0.508833	172.487	0.439983	232.148	0.410176	68.0999	0.333897	98.9917	0.381246	80.9573	0.459836	81.0229	0.610126	142.795	0.456306	86.8309	0.364756	63.2744	0.346985	80.5963	0.524931	89.9804	0.478947	91.4602	0.427881	61.2876	0.423543	102.978	0.43431	81.3987	0.474783	30.0834	0.60109	160.153	0.618593	40.0606	0.526432	103.976	0.601055	295.784	0.46839	101.809	0.517193
Hex9HexNAc2	2396.18	1062.23	4.71593	4309.95	6.44903	1191.12	2.97592	809.427	2.0647	1839.53	3.25022	665.185	3.26144	680.119	2.61933	633.889	3.60048	478.198	3.60097	1154.8	3.69019	1077.18	4.52499	506.716	2.77874	843.169	5.49163	783.473	4.17027	836.674	3.91423	500.514	3.45893	716.248	3.02079	523.686	3.05456	126.232	2.52221	672.434	2.59728	258.048	3.39099	441.899	2.55448	2415.62	3.82526	886.792	4.50492
NeuAc1Hex5HexNAc4	2431.21	64.2744	0.285356	194.316	0.290758	154.077	0.384951	123.975	0.316237	162.362	0.286873	42.979	0.210728	71.293	0.27457	52.7268	0.299487	39.7519	0.299343	81.6504	0.260916	53.3063	0.223927	39.9985	0.219344	46.8424	0.305089	52.834	0.281224	58.1587	0.272086	36.74	0.253901	57.5719	0.242811	52.1841	0.30438	18.0973	0.361597	100.397	0.387783	25.0715	0.329462	90.2043	0.521443	159.855	0.253139	56.5799	0.287427
Fuc1Hex6HexNAc4	2448.22	261.56	1.16124	1180.86	1.76693	822.305	2.05447	755.625	1.92746	376.309	0.664891	392.856	1.9262	251.06	0.966906	194.226	1.1032	143.362	1.07956	302.761	0.967482	194.665	0.817742	180.946	0.992276	234.891	1.52986	217.67	1.15861	223.758	1.04681	175.358	1.21185	367.03	1.54795	257.199	1.50019	99.6285	1.99065	420.104	1.62266	145.083	1.90652	433.788	2.50759	1014.74	1.60689	345.215	1.7537
NeuGc1Hex5HexNAc4	2461.22	3253.37	14.4438	15751.5	23.5691	6531.64	16.3188	6962.38	17.7597	9690.86	17.1225	3396.62	16.6538	2956.52	11.3864	2369.51	13.4588	1918.2	14.4446	3300.09	10.5455	2231.2	9.37277	1709.29	9.37342	2058.73	13.4087	2621.81	13.9554	3071.81	14.371	2634.48	18.2062	4287.92	18.0844	3008.27	17.5467	1049.77	20.9752	5151.57	19.898	1442	18.9491	3683.71	21.2944	10846.8	17.1765	3139.89	15.9507
Fuc1Hex5HexNAc5	2489.25	29.9822	0.13311	76.8639	0.115012	81.7662	0.204287	79.2034	0.202033	94.11	0.16628	26.6855	0.130841	34.3698	0.132368	25.6648	0.145776	31.3165	0.235822	28.753	0.0918811	20.503	0.0861285	20.7476	0.113776	32.4049	0.211056	28.0584	0.149349	28.4511	0.133104	26.435	0.182686	33.2102	0.140064	35.398	0.20647	18.5884	0.37141	69.8303	0.26972	18.0599	0.237323	41.7876	0.241561	78.1119	0.123694	33.861	0.172014
NeuAc1Fuc1Hex5HexNAc4	2605.30	29.2969	0.130068	81.0166	0.121226	86.3832	0.215822	61.4417	0.156727	65.2215	0.115238	16.7266	0.0820116	24.3186	0.0936579	27.4091	0.155683	21.0935	0.15884	38.5506	0.12319	21.6434	0.0909187	21.324	0.116937	23.1295	0.150644	20.4714	0.108965	28.2568	0.132195	23.6794	0.163642	26.2091	0.110537	23.1967	0.135302	7.84794	0.156808	52.7893	0.203899	11.9898	0.157556	29.2636	0.169164	66.5236	0.105344	31.0904	0.15794
Fuc2Hex6HexNAc4	2622.31	31.1407	0.138254	111.031	0.166137	120.717	0.301604	98.5641	0.251419	110.09	0.194514	21.2796	0.104335	37.004	0.142513	26.0795	0.148131	20.6947	0.155837	48.8453	0.156087	33.0727	0.138931	22.9471	0.125837	25.4095	0.165494	26.7839	0.142565	27.4839	0.128579	24.5736	0.169822	31.1346	0.131311	28.477	0.166101	11.1537	0.222859	74.1551	0.286425	15.68	0.206049	43.7924	0.25315	82.707	0.130971	45.6747	0.232028
NeuGc1Fuc1Hex5HexNAc4	2635.31	72.9426	0.323839	234.187	0.350417	200.325	0.500498	150.168	0.383051	139.725	0.246876	48.373	0.237175	57.8185	0.222676	54.984	0.312308	36.4532	0.274503	88.8851	0.284035	69.9438	0.293817	45.065	0.247128	44.0267	0.28675	36.8592	0.196194	52.3331	0.244832	41.0079	0.283396	68.0505	0.287004	49.5682	0.289122	14.1953	0.283633	109.428	0.422668	23.4697	0.308413	53.6341	0.310042	204.752	0.324236	58.5373	0.29737
NeuAc1Hex6HexNAc4	2635.31
Fuc1Hex7HexNAc4	2652.32	34.3744	0.15261	84.1739	0.12595	76.8081	0.1919	70.8819	0.180807	90.8936	0.160597	17.8249	0.0873966	24.3872	0.093922	19.1939	0.109021	17.9465	0.135142	35.8905	0.114689	31.5185	0.132402	15.4759	0.084867	25.3688	0.165229	18.8559	0.100366	20.7663	0.0971517	20.3254	0.140463	25.9937	0.109629	25.292	0.147523	9.32403	0.186301	58.5429	0.226123	10.8483	0.142556	30.9005	0.178626	85.3938	0.135226	28.2322	0.14342
Fuc1Hex6HexNAc5	2693.35	16.6691	0.074005	65.1424	0.0974735	56.0343	0.139998	59.0828	0.150709	54.7136	0.096672	15.8789	0.0778552	21.598	0.08318	17.6913	0.100486	18.9303	0.14255	20.9592	0.0669758	18.414	0.0773529	10.4813	0.0574775	16.9623	0.110477	18.2558	0.0971716	21.5471	0.100804	16.9083	0.116849	19.8813	0.0838498	20.0507	0.116952	13.0773	0.261295	44.0921	0.170306	8.83362	0.116082	29.0776	0.168089	53.5711	0.0848327	22.4358	0.113974
NeuAc2Hex5HexNAc4	2792.38	41.9983	0.186458	115.635	0.173026	101.849	0.254463	90.1317	0.229909	100.903	0.178283	26.4179	0.129528	32.7113	0.125981	29.7352	0.168895	19.7646	0.148833	43.4062	0.138706	24.3582	0.102323	22.4219	0.122958	17.1863	0.111936	26.2019	0.139467	32.9056	0.153943	18.8644	0.130367	37.5296	0.158282	35.4591	0.206826	12.0329	0.240427	75.3729	0.291129	14.5763	0.191545	54.217	0.313411	76.0127	0.12037	33.8909	0.172166
NeuGc1Fuc2Hex5HexNAc4	2809.40	81.0599	0.359877	292.936	0.438325	276.068	0.689736	292.111	0.745121	339.945	0.60064	64.9327	0.318369	85.497	0.329273	67.3526	0.382562	53.2393	0.400907	111.965	0.357786	50.746	0.213172	40.5481	0.222358	59.7802	0.389354	52.2679	0.278211	93.2337	0.436178	48.1116	0.332487	97.1311	0.409652	80.1564	0.467537	32.6782	0.652936	186.74	0.721287	40.9794	0.538506	110.809	0.640555	220.238	0.34876	87.2636	0.4433
NeuAc1Fuc1Hex6HexNAc4	2809.40
NeuAc1NeuGc1Hex5HexNAc4	2822.39	85.1235	0.377919	246.498	0.368838	143.078	0.357471	170.73	0.435501	228.589	0.403888	48.6728	0.238646	58.945	0.227014	45.644	0.259257	33.3085	0.250822	65.9019	0.210591	36.584	0.153681	38.1021	0.208945	34.4059	0.224089	42.5486	0.226477	46.7697	0.218804	43.0023	0.297178	66.0649	0.27863	60.4192	0.352414	19.3014	0.385656	124.067	0.47921	19.0063	0.24976	67.4262	0.38977	129.362	0.204853	53.9348	0.27399
NeuGc1Fuc1Hex6HexNAc4	2839.41	999.664	4.43816	2033.01	3.04202	1327.51	3.31669	1453.26	3.707	659.599	1.16543	580.443	2.84595	592.084	2.28029	344.852	1.95875	191.9	1.44506	548.939	1.75415	373.633	1.56954	412.175	2.26029	320.904	2.09007	316.363	1.68393	324.884	1.51991	401.143	2.7722	951.37	4.01242	492.215	2.871	134.899	2.69538	702.507	2.71344	225.244	2.9599	534.262	3.0884	1763.41	2.79245	526.71	2.67569
NeuGc2Hex5HexNAc4	2852.40	4317.92	19.1701	10437.2	15.6173	10699.8	26.7327	11042.7	28.1678	16038.5	28.338	7041.7	34.5258	6350.62	24.4581	4663.31	26.4875	862.402	6.49413	5944.48	18.9958	4465.34	18.7578	5497.81	30.149	896.054	5.83608	1797.55	9.568	2028.18	9.48851	2165.13	14.9627	3449.55	14.5485	3175.23	18.5205	518.614	10.3623	2579.65	9.96393	873.498	11.4786	1687.65	9.75579	6674.03	10.5687	1576.31	8.0077
NeuAc1Hex6HexNAc5	2880.44	36.8514	0.163607	76.9298	0.115111	96.0994	0.240097	92.8033	0.236724	99.3462	0.175532	21.2531	0.104205	32.2951	0.124378	33.9501	0.192836	23.0369	0.173475	38.3416	0.122522	16.8576	0.0708149	16.5738	0.0908877	21.7742	0.141817	19.272	0.102581	30.3198	0.141846	17.9849	0.124289	31.7055	0.133719	40.3783	0.235519	15.4708	0.309117	71.6563	0.276773	18.4805	0.242851	31.3172	0.181035	58.8212	0.0931466	27.771	0.141077
NeuGc1Fuc1Hex5HexNAc5	2880.44
NeuAc2Fuc1Hex5HexNAc4	2966.47	28.9116	0.128357	37.6424	0.0563248	58.5885	0.146379	39.375	0.100438	39.2127	0.0692839	14.542	0.0713003	21.7389	0.0837228	16.0405	0.09111	8.77118	0.0660495	24.7214	0.0789981	18.3571	0.0771138	7.64572	0.0419277	12.3376	0.0803559	10.7091	0.0570022	14.6282	0.0684354	9.11557	0.0629954	23.566	0.09939	21.0309	0.122669	4.72141	0.0943374	25.999	0.100421	11.2244	0.147499	6.82368	0.0394456	32.7974	0.0519365	11.5208	0.058526
NeuAc1NeuGc1Fuc1Hex5HexNAc4	2996.48	36.2478	0.160928	50.8132	0.0760324	53.9543	0.134801	38.31	0.0977218	33.1103	0.0585017	10.8506	0.0532012	14.8494	0.0571892	14.9514	0.0849237	7.58694	0.0571319	21.9026	0.0699904	16.9149	0.0710556	15.2168	0.0834459	12.298	0.0800982	9.3127	0.0495696	9.60311	0.0449265	12.0885	0.0835409	15.7588	0.0664632	16.274	0.0949232	5.76911	0.115271	27.1911	0.105026	15.3032	0.201098	11.3445	0.065579	39.5345	0.062605	19.0039	0.0965399
NeuGc2Fuc1Hex5HexNAc4	3026.49	108.708	0.482627	231.463	0.346341	132.714	0.331578	95.527	0.243672	94.0276	0.166135	32.0684	0.157233	40.7073	0.156775	21.4185	0.121657	19.6244	0.147777	58.4441	0.18676	40.8192	0.171472	42.4953	0.233036	16.1806	0.105385	21.048	0.112034	36.8796	0.172535	45.592	0.315075	54.8743	0.231433	55.6987	0.32488	7.93545	0.158556	53.1536	0.205306	19.6021	0.257589	19.0296	0.110004	129.255	0.204682	33.1252	0.168276
Fuc1NeuAc1Hex6HexNAc5	3054.52	6.71821	0.0298265	22.7374	0.0340223	32.6755	0.0816374	24.871	0.0634414	35.8357	0.0633171	10.5565	0.0517592	10.4787	0.0403564	9.26615	0.0526315	10.4489	0.078683	9.56498	0.0305652	7.33105	0.030796	6.89042	0.0377858	9.25828	0.0603	5.43611	0.0289353	9.4912	0.0444029	8.10846	0.0560355	8.74936	0.0369006	9.99196	0.0582812	3.10002	0.0619408	21.3816	0.0825867	3.22127	0.0423304	9.98224	0.0577042	13.5323	0.0214292	9.22792	0.046878
NeuGc1Fuc1Hex6HexNAc5	3084.54	18.075	0.0802468	38.5347	0.05766	33.8991	0.0846945	43.2484	0.110319	43.0872	0.0761296	9.88097	0.0484469	14.9674	0.0576438	11.4994	0.0653161	6.27332	0.0472399	12.8107	0.040937	10.5118	0.0441577	12.0083	0.0658513	7.01752	0.0457057	11.0051	0.0585777	9.46181	0.0442654	6.23361	0.0430789	17.1543	0.0723485	22.3926	0.130612	4.89229	0.0977516	17.9629	0.0693819	8.79674	0.115597	0	0	18.1888	0.028803	13.3252	0.0676925
NeuAc1Hex7HexNAc5	3084.54
NeuAc2Hex6HexNAc5	3241.61	11.1557	0.0495276	20.0941	0.030067	21.9136	0.0547497	26.8051	0.0683749	36.2417	0.0640345	7.08175	0.0347222	11.7458	0.0452365	0	0	0	0	9.20112	0.0294024	1.82875	0.00768215	7.85736	0.0430883	0	0	0	0	0	0	3.82854	0.0264581	6.49328	0.0273855	13.0848	0.0763212	0	0	23.7878	0.0918808	6.76152	0.0888524	0	0	14.7316	0.0233283	6.34506	0.032233
NeuGc3Hex5HexNAc4	3243.48	147.956	0.656873	365.223	0.546488	186.138	0.465053	215.286	0.549155	372.921	0.658904	61.117	0.29966	92.5223	0.35633	71.3384	0.4052	19.8878	0.149761	48.9981	0.156575	35.0918	0.147413	46.1276	0.252955	21.0491	0.137095	29.3636	0.156296	50.2575	0.235121	47.5865	0.328858	97.4898	0.411165	118.513	0.691265	20.2506	0.404622	90.6169	0.350009	24.3784	0.320354	25.5888	0.147921	122.788	0.194441	50.5669	0.256881
NeuAc1Fuc1Hex7HexNAc5	3258.62	26.0163	0.115503	53.5024	0.0800564	65.3021	0.163153	72.3359	0.184515	92.8945	0.164133	9.36411	0.0459127	24.7026	0.0951368	19.8483	0.112738	8.11901	0.0611385	15.6715	0.0500788	10.4422	0.0438651	11.2567	0.0617294	10.382	0.0676191	6.18921	0.0329439	15.5261	0.0726361	12.6679	0.0875445	16.9912	0.0716608	23.4137	0.136568	7.54552	0.150765	36.8536	0.142347	6.64247	0.087288	9.22609	0.0533331	26.1508	0.0414113	16.5139	0.0838907
NeuAc1NeuGc1Hex6HexNAc5	3271.62	10.6604	0.0473286	18.5713	0.0277884	25.4376	0.0635539	25.6686	0.0654759	39.9269	0.0705457	9.29186	0.0455585	14.8292	0.0571114	13.0522	0.0741361	7.10673	0.0535157	11.9172	0.0380818	0	0	8.20164	0.0449763	9.74755	0.0634866	5.80336	0.0308901	8.49661	0.0397499	0	0	4.81504	0.0203075	11.453	0.066803	0	0	23.659	0.0913831	0	0	7.10779	0.0410879	12.7878	0.0202501	11.6983	0.0594278
NeuGc1Fuc1Hex7HexNAc5	3288.64	31.8166	0.141255	100.219	0.149959	105.531	0.263661	131.519	0.335479	87.8223	0.155171	40.7308	0.199705	57.9985	0.223369	32.8065	0.18634	14.066	0.105921	41.7583	0.13344	22.6236	0.0950364	26.7483	0.146683	18.6276	0.121323	10.2066	0.0543278	22.9495	0.107365	19.0009	0.131311	39.4287	0.166291	41.8025	0.243826	8.43401	0.168518	44.1097	0.170374	21.6181	0.284081	22.8788	0.132255	63.4836	0.10053	45.5798	0.231546
NeuGc2Hex6HexNAc5	3301.63	51.3975	0.228187	312.45	0.467524	143.037	0.357368	183.461	0.467976	331.632	0.585952	61.5507	0.301787	128.833	0.496173	72.003	0.408976	23.918	0.180109	63.516	0.202967	40.5911	0.170514	51.1759	0.280639	30.987	0.201821	24.6296	0.131098	61.1289	0.285981	41.3192	0.285547	75.4691	0.318292	97.4536	0.568428	17.3692	0.34705	78.3424	0.302599	35.3982	0.465165	23.0076	0.133	127.912	0.202556	56.0039	0.284501
NeuAc2Fuc1Hex6HexNAc5	3415.70	9.4	0.0417327	0	0	10.9926	0.0274643	7.99266	0.0203878	11.8153	0.0208762	0	0	10.8616	0.0418311	0	0	0	0	0	0	9.67771	0.0406538	0	0	0	0	7.70353	0.0410043	0	0	0	0	0	0	0	0	0	0	0	0	4.15827	0.0546434	0	0	7.73945	0.0122558	3.03398	0.0154126
NeuAc2Hex7HexNAc5	3445.71	0	0	0	0	11.4117	0.0285114	8.61071	0.0219643	13.8264	0.0244294	0	0	0	0	7.36941	0.0418581	0	0	0	0	0	0	0	0	0	0	0	0	0	0	0	0	4.96786	0.020952	0	0	0	0	0	0	9.08516	0.119387	4.39541	0.0254085	0	0	7.59937	0.0386049
NeuAc1Fuc1Hex8HexNAc5	3462.72	7.62556	0.0338548	18.8954	0.0282734	17.5707	0.043899	12.2521	0.0312529	13.3756	0.0236329	2.87159	0.0140796	5.23413	0.0201582	0	0	4.18853	0.0315408	0	0	5.52877	0.023225	8.08637	0.0443442	0	0	0	0	0	0	0	0	0	0	6.8743	0.0400965	4.68104	0.0935308	7.61772	0.0294235	0	0	0	0	7.42933	0.0117648	0	0
NeuGc2Fuc1Hex6HexNAc5	3475.72	6.93969	0.0308098	13.2519	0.019829	12.298	0.0307257	13.0144	0.0331973	18.0012	0.0318058	0	0	6.1383	0.0236404	3.99634	0.0226991	0	0	0	0	2.72347	0.0114407	7.61632	0.0417665	5.76547	0.037551	4.02712	0.0214355	0	0	0	0	5.82484	0.0245664	7.02174	0.0409565	0	0	4.19111	0.0161882	5.7431	0.0754695	5.76868	0.0333469	11.4213	0.0180863	0	0
NeuGc1Fuc1Hex8HexNAc5	3492.73	5.71775	0.0253848	11.2021	0.0167618	11.8102	0.0295069	6.6343	0.0169229	7.5092	0.0132678	7.11875	0.0349036	8.92545	0.0343745	0	0	0	0	6.88864	0.0220129	5.12934	0.0215471	3.04228	0.0166833	2.89074	0.0188276	0	0	0	0	0	0	0	0	0	0	0	0	0	0	0	0	0	0	13.9403	0.0220752	0	0
NeuAc1Fuc1Hex7HexNAc6	3503.75	0	0	0	0	6.75109	0.0168671	0	0	0	0	0	0	0	0	3.12116	0.0177281	0	0	0	0	0	0	0	0	0	0	0	0	0	0	0	0	0	0	2.91763	0.017018	0	0	0	0	0	0	0	0	0	0	0	0
NeuAc2Fuc1Hex7HexNAc5	3619.80	7.20851	0.0320032	8.62346	0.0129034	15.5475	0.0388442	19.927	0.05083	14.8186	0.0261826	2.8356	0.0139031	9.26889	0.0356972	6.98295	0.039663	4.04572	0.0304654	0	0	0	0	0	0	0	0	4.38052	0.0233166	0	0	0	0	0	0	8.14843	0.0475283	4.79515	0.0958107	14.9942	0.0579154	4.34718	0.0571259	0	0	0	0	10.887	0.0553063
NeuAc2NeuGc1Hex6HexNAc5	3632.79	6.20734	0.0275584	9.3172	0.0139414	0	0	14.4597	0.0368839	14.7675	0.0260922	0	0	6.64315	0.0255847	8.60486	0.0488754	0	0	6.25861	0.0199996	8.51933	0.0357877	0	0	0	0	3.43771	0.0182982	0	0	0	0	0	0	0	0	4.59346	0.0917809	8.53728	0.0329753	0	0	0	0	0	0	0	0
NeuGc2Fuc2Hex6HexNAc5	3649.81	17.0241	0.0755809	18.7703	0.0280863	26.4955	0.0661971	35.9153	0.0916133	58.1036	0.102662	10.649	0.0522128	15.7357	0.0606028	12.3163	0.0699566	8.07282	0.0607907	8.24216	0.0263381	7.7684	0.0326332	6.0475	0.0331634	5.31707	0.0346305	0	0	11.7324	0.0548879	0	0	0	0	10.3566	0.0604079	3.82375	0.0764014	22.969	0.0887181	6.09922	0.0801492	9.63249	0.0556824	16.9355	0.0268182	12.3841	0.0629112
NeuAc2Fuc1Hex6HexNAc6	3660.82	2.6174	0.0116203	14.8713	0.0222521	0	0	0	0	27.2749	0.0481912	0	0	0	0	7.06375	0.0401219	3.48523	0.0262448	6.32058	0.0201976	0	0	6.18019	0.033891	0	0	0	0	6.3705	0.0298033	0	0	0	0	0	0	4.85675	0.0970416	0	0	0	0	0	0	0	0	0	0
NeuAc1Fuc2Hex7HexNAc6	3677.84	7.11655	0.031595	18.6249	0.0278687	17.2663	0.0431386	17.1775	0.0438166	22.0968	0.0390423	5.65115	0.0277079	10.5097	0.040476	10.0394	0.0570235	4.85067	0.036527	6.69274	0.0213869	6.06696	0.0254859	5.17046	0.0283538	0	0	2.41036	0.0128298	8.26637	0.0386728	0	0	9.42922	0.0397679	9.78504	0.0570743	11.7149	0.234073	11.6503	0.0449996	2.36262	0.031047	0	0	18.4684	0.0292457	9.70517	0.0493024
NeuGc3Hex6HexNAc5	3692.81	176.569	0.783903	395.002	0.591047	114.67	0.286495	172.37	0.439683	276.912	0.489268	126.11	0.618325	208.014	0.801124	96.3057	0.547014	24.1807	0.182088	44.8666	0.143373	71.5418	0.30053	131.076	0.718798	14.5065	0.0944818	45.5879	0.242655	73.3927	0.343355	48.7674	0.337019	116.998	0.49344	236.458	1.37921	3.98019	0.0795271	68.1417	0.263198	47.7864	0.627957	20.9309	0.120995	170.148	0.269439	61.7143	0.313509
NeuAc3Fuc1Hex6HexNAc5	3776.87	14.0126	0.062211	8.64186	0.0129309	0	0	7.42647	0.0189436	12.3095	0.0217493	3.07578	0.0150807	0	0	9.81729	0.055762	4.05123	0.030507	8.85929	0.0283101	0	0	11.2668	0.0617849	3.73613	0.0243338	0	0	8.4907	0.0397223	0	0	6.93098	0.0292315	0	0	0	0	0	0	0	0	5.75303	0.0332565	7.17624	0.011364	9.87268	0.0501533
NeuAc2NeuGc1Fuc1Hex6HexNAc5	3806.88	0	0	15.7843	0.0236183	9.35374	0.0233696	0	0	11.1609	0.0197199	0	0	0	0	0	0	4.59665	0.0346141	0	0	3.73932	0.015708	5.73426	0.0314456	0	0	0	0	0	0	0	0	9.25208	0.0390208	0	0	3.07593	0.0614595	8.52768	0.0329383	0	0	0	0	0	0	0	0
NeuAc1NeuGc2Fuc1Hex6HexNAc5	3836.89	12.357	0.0548609	0	0	4.84044	0.0120935	10.7057	0.0273083	0	0	6.09702	0.029894	0	0	0	0	0	0	0	0	0	0	0	0	0	0	0	0	6.74342	0.0315479	0	0	3.21121	0.0135433	0	0	0	0	0	0	0	0	0	0	0	0	0	0
NeuAc2Fuc1Hex7HexNAc6	3864.92	0	0	8.52254	0.0127524	9.96703	0.0249019	0	0	0	0	0	0	0	0	4.3872	0.0249192	0	0	4.21946	0.0134834	0	0	0	0	0	0	2.76989	0.0147435	0	0	0	0	0	0	0	0	2.79473	0.0558408	0	0	0	0	0	0	0	0	0	0
NeuAc2Hex8HexNAc6	3894.94	0	0	2.08302	0.00311685	0	0	0	0	0	0	0	0	0	0	0	0	0	0	0	0	0	0	0	0	0	0	0	0	8.14785	0.0381183	0	0	0	0	0	0	3.20711	0.0640804	9.28964	0.0358813	0	0	0	0	0	0	0	0
		22524.3	100	66830.9	100	40025.2	100	39203.1	100	56597.2	100	20395.4	100	25965.3	100	17605.7	100	13279.7	100	31293.7	100	23805.2	100	18235.5	100	15353.7	100	18787.1	100	21375.2	100	14470.2	100	23710.6	100	17144.4	100	5004.82	100	25889.9	100	7609.83	100	17299	100	63149	100	19685	100

## Sheet: grouping mannose vs complex
		13 weeks wt							46 weeks wt							70 weeks wt							22 months wt
		1	2	3	4	5	6		1	2	3	4	5	6		1	2	3	4	5	6		1	238	239	249	251	252
m/z		rel area	rel area	rel area	rel area	rel area	rel area		rel area	rel area	rel area	rel area	rel area	rel area		rel area	rel area	rel area	rel area	rel area	rel area		rel area	rel area	rel area	rel area	rel area	rel area
1171.48	Hex3HexNAc2	1.17536	0.765628	1.28661	1.13193	1.51042	1.0366		1.92933	2.2851	2.58822	2.1683	1.57436	1.88659		2.08845	2.36918	2.24202	2.33586	1.59959	2.34889		1.99744	1.78719	3.01402	1.92029	2.0015	1.8775
1345.55	Fuc1Hex3HexNAc2	0.692527	0.426931	0.569462	0.537624	0.557115	0.498259		0.901072	0.987044	1.08736	0.97331	0.798428	0.809652		0.984994	1.14867	1.1992	0.983766	0.929401	1.23088		0.838561	0.957616	1.39648	0.99504	1.21988	1.19257
1375.62	Hex4HexNAc2 (Man4)	1.91926	1.63593	1.93917	1.81509	2.24057	1.78186		4.06607	4.12887	4.762	3.38972	2.73857	3.04934		3.57083	3.80969	3.65824	3.60038	3.2268	4.2512		3.59722	3.2343	5.46584	3.44634	3.69082	3.17293
1416.64	Hex3HexNAc3	1.21754	1.29017	1.81551	1.92999	2.5529	1.74046		2.38322	2.21652	2.40219	2.16583	1.8247	2.28181		2.66936	2.5712	2.6016	3.2531	1.88912	2.91999		2.07316	1.7671	2.87517	1.43288	1.42333	1.1962
1579.78	Hex5HexNAc2	12.3694	9.60375	7.63929	7.23908	7.24307	8.28081		16.0683	16.6667	16.8051	14.7404	13.2325	11.3695		11.4438	12.6273	13.3034	12.9813	14.9456	16.0312		13.5697	12.3023	17.7129	15.2489	16.8555	13.2788
1620.72	Hex4HexNAc3	1.31515	1.54988	1.72326	1.88174	1.20027	1.50655		2.16935	2.25453	2.41169	1.77867	1.9105	1.68367		2.16607	1.08591	2.31974	2.72246	1.78171	1.09073		1.99462	1.49099	3.37141	1.7618	0.818589	0.45114
1783.88	Hex6HexNAc2	15.0147	10.2205	7.05274	6.33916	7.39639	7.92317		16.0132	15.4297	13.914	11.9213	12.4409	9.85979		9.87939	10.3059	10.2495	9.34133	14.0648	12.3908		11.9427	9.944	13.8013	15.3346	16.5557	12.8286
1807.8	NeuGc1Hex3HexNAc3	2.18376	2.15273	3.50203	3.38168	3.94369	2.5923		2.40164	3.28202	4.11126	3.32049	3.41828	3.66675		3.94964	4.33384	3.36302	4.58325	2.92381	4.34619		3.06102	2.99541	2.9265	2.24087	2.11483	2.59233
1835.93	Fuc1Hex3HexNAc4	0.288076	0.155621	0.272731	0.237514	0.263957	0.197699		0.24945	0.249477	0.285922	0.213834	0.206386	0.282023		0.349987	0.378924	0.392449	0.440678	0.248064	0.30511		0.340075	0.20662	0.309091	0.209094	0.270863	0.263725
1865.84	Hex4HexNAc4	1.14832	1.51193	1.75264	1.79835	1.82047	1.53327		2.48662	1.93784	2.10675	1.87147	1.65782	1.72279		2.59692	2.46005	2.27426	0	1.8519	2.36694		1.66627	1.50622	2.57911	1.21024	1.1151	0.99035
1987.98	Hex7HexNAc2	4.74729	3.2972	2.53004	2.2512	2.7592	2.35176		5.37041	4.49268	4.06711	2.95927	3.36248	2.81544		3.72102	3.47787	3.10162	3.05181	4.53701	3.75266		3.27371	3.14606	4.0117	5.2593	4.82416	3.54032
2011.88	NeuGc1Hex4HexNAc3	1.72771	2.20204	2.47196	2.08846	2.60628	1.70343		2.08624	2.47005	2.60338	2.20674	2.40948	2.43371		2.40782	3.1829	2.11721	3.15998	2.22627	2.69825		2.09045	2.01199	2.09275	1.65799	1.3301	1.6959
2029.01	Hex6HexNAc3	0.327925	0.375177	0.364885	0.335513	0.302439	0.371497		0.489732	0.447261	0.434918	0.414494	0.373086	0.391367		0.673385	0.512999	0.450162	0.565315	0.369466	0.53927		0.353965	0.347683	0.446254	0.298333	0.308508	0.301803
2040.03	Fuc1Hex4HexNAc4	0.165385	0.122195	0.203046	0.197715	0.191866	0.150126		0.197848	0.229698	0.216903	0.195752	0.211607	0.220108		0.289231	0.312247	0.368125	0.418599	0.365894	0.316417		0.244881	0.19278	0.382312	0.163873	0.168538	0.212809
2070.04	Hex5HexNAc4	0.716274	1.46499	1.26655	1.2586	1.16517	1.16479		1.55495	1.08446	1.06288	1.12945	1.11671	1.16793		1.74043	1.56636	1.54133	2.08515	1.29626	1.47813		0.956481	1.00579	1.63651	0.822595	0.716927	0.519619
2081.05	Fuc1Hex3HexNAc5	0.104891	0.0434041	0.0700524	0.0771771	0.0922755	0.0484719		0.0855082	0.0814284	0.073269	0.0814209	0.0900292	0.0791067		0.14955	0.127764	0.0884027	0.0660528	0.0555756	0.0939252		0.0649461	0.0676789	0.0813329	0.073794	0.0743398	0.0905783
2111.06	Hex4HexNAc5	0.138905	0.099088	0.19176	0.201693	0.328686	0.200584		0.24283	0.136244	0.204293	0.182168	0.152194	0.237651		0.20959	0.420576	0.280232	0.222213	0.152035	0.243002		0.158695	0.144877	0.199949	0.132074	0.100241	0.100206
2192.08	Hex8HexNAc2	2.90954	5.12834	3.08017	2.90476	3.26671	0.509275		7.05684	5.8173	4.40964	3.39246	4.50739	3.1644		3.6299	3.33476	3.35304	3.08598	5.86039	3.65189		3.63011	3.30463	4.34873	6.86484	6.82227	4.67608
2244.13	Fuc1Hex5HexNAc4	0.532426	0.593143	0.858907	0.697877	0.344958	2.90803		0.694476	0.484032	0.549532	0.570748	0.701659	0.601012		0.636523	0.71716	0.7396	1.03978	0.693035	0.689289		0.464999	0.552681	0.656458	0.417336	0.458921	0.372497
2256.99	NeuGc1Hex4HexNAc4	1.13607	1.25726	3.10322	3.11349	3.53091	0.0587258		1.13016	1.31278	1.28298	1.23685	1.29067	1.41144		1.52096	1.61568	1.27762	1.68427	1.1969	1.31021		0.903906	1.03133	1.12523	0.767465	0.696974	0.766239
2285.15	Fuc1Hex4HexNAc5	0.105685	0.0498401	0.0990051	0.107075	0.0869996	0.0587239		0.106566	0.0825774	0.101202	0.0993236	0.0661802	0.113202		0.194946	0.178314	0.0919668	0.161162	0.0706331	0.128744		0.08279	0.0910711	0.136263	0.0926543	0.0756392	0.0663409
2390.18	NeuAc1Hex6HexNAc3	0.477734	0.561883	0.508833	0.439983	0.410176	0.333897		0.524931	0.478947	0.427881	0.423543	0.43431	0.474783		0.60109	0.618593	0.526432	0.601055	0.46839	0.517193		0.381246	0.459836	0.610126	0.456306	0.364756	0.346985
2396.18	Hex9HexNAc2	4.71593	6.44903	2.97592	2.0647	3.25022	3.26144		5.49163	4.17027	3.91423	3.45893	3.02079	3.05456		2.52221	2.59728	3.39099	2.55448	3.82526	4.50492		2.61933	3.60048	3.60097	3.69019	4.52499	2.77874
2431.21	NeuAc1Hex5HexNAc4	0.285356	0.290758	0.384951	0.316237	0.286873	0.210728		0.305089	0.281224	0.272086	0.253901	0.242811	0.30438		0.361597	0.387783	0.329462	0.521443	0.253139	0.287427		0.27457	0.299487	0.299343	0.260916	0.223927	0.219344
2448.22	Fuc1Hex6HexNAc4	1.16124	1.76693	2.05447	1.92746	0.664891	1.9262		1.52986	1.15861	1.04681	1.21185	1.54795	1.50019		1.99065	1.62266	1.90652	2.50759	1.60689	1.7537		0.966906	1.1032	1.07956	0.967482	0.817742	0.992276
2461.22	NeuGc1Hex5HexNAc4	14.4438	23.5691	16.3188	17.7597	17.1225	16.6538		13.4087	13.9554	14.371	18.2062	18.0844	17.5467		20.9752	19.898	18.9491	21.2944	17.1765	15.9507		11.3864	13.4588	14.4446	10.5455	9.37277	9.37342
2489.25	Fuc1Hex5HexNAc5	0.13311	0.115012	0.204287	0.202033	0.16628	0.130841		0.211056	0.149349	0.133104	0.182686	0.140064	0.20647		0.37141	0.26972	0.237323	0.241561	0.123694	0.172014		0.132368	0.145776	0.235822	0.0918811	0.0861285	0.113776
2605.30	NeuAc1Fuc1Hex5HexNAc4	0.130068	0.121226	0.215822	0.156727	0.115238	0.0820116		0.150644	0.108965	0.132195	0.163642	0.110537	0.135302		0.156808	0.203899	0.157556	0.169164	0.105344	0.15794		0.0936579	0.155683	0.15884	0.12319	0.0909187	0.116937
2622.31	Fuc2Hex6HexNAc4	0.138254	0.166137	0.301604	0.251419	0.194514	0.104335		0.165494	0.142565	0.128579	0.169822	0.131311	0.166101		0.222859	0.286425	0.206049	0.25315	0.130971	0.232028		0.142513	0.148131	0.155837	0.156087	0.138931	0.125837
2635.31	NeuGc1Fuc1Hex5HexNAc4	0.323839	0.350417	0.500498	0.383051	0.246876	0.237175		0.28675	0.196194	0.244832	0.283396	0.287004	0.289122		0.283633	0.422668	0.308413	0.310042	0.324236	0.29737		0.222676	0.312308	0.274503	0.284035	0.293817	0.247128
2635.31	NeuAc1Hex6HexNAc4
2652.32	Fuc1Hex7HexNAc4	0.15261	0.12595	0.1919	0.180807	0.160597	0.0873966		0.165229	0.100366	0.0971517	0.140463	0.109629	0.147523		0.186301	0.226123	0.142556	0.178626	0.135226	0.14342		0.093922	0.109021	0.135142	0.114689	0.132402	0.084867
2693.35	Fuc1Hex6HexNAc5	0.074005	0.0974735	0.139998	0.150709	0.096672	0.0778552		0.110477	0.0971716	0.100804	0.116849	0.0838498	0.116952		0.261295	0.170306	0.116082	0.168089	0.0848327	0.113974		0.08318	0.100486	0.14255	0.0669758	0.0773529	0.0574775
2792.38	NeuAc2Hex5HexNAc4	0.186458	0.173026	0.254463	0.229909	0.178283	0.129528		0.111936	0.139467	0.153943	0.130367	0.158282	0.206826		0.240427	0.291129	0.191545	0.313411	0.12037	0.172166		0.125981	0.168895	0.148833	0.138706	0.102323	0.122958
2809.40	NeuGc1Fuc2Hex5HexNAc4	0.359877	0.438325	0.689736	0.745121	0.60064	0.318369		0.389354	0.278211	0.436178	0.332487	0.409652	0.467537		0.652936	0.721287	0.538506	0.640555	0.34876	0.4433		0.329273	0.382562	0.400907	0.357786	0.213172	0.222358
2809.40	NeuAc1Fuc1Hex6HexNAc4
2822.39	NeuAc1NeuGc1Hex5HexNAc4	0.377919	0.368838	0.357471	0.435501	0.403888	0.238646		0.224089	0.226477	0.218804	0.297178	0.27863	0.352414		0.385656	0.47921	0.24976	0.38977	0.204853	0.27399		0.227014	0.259257	0.250822	0.210591	0.153681	0.208945
2839.41	NeuGc1Fuc1Hex6HexNAc4	4.43816	3.04202	3.31669	3.707	1.16543	2.84595		2.09007	1.68393	1.51991	2.7722	4.01242	2.871		2.69538	2.71344	2.9599	3.0884	2.79245	2.67569		2.28029	1.95875	1.44506	1.75415	1.56954	2.26029
2852.40	NeuGc2Hex5HexNAc4	19.1701	15.6173	26.7327	28.1678	28.338	34.5258		5.83608	9.568	9.48851	14.9627	14.5485	18.5205		10.3623	9.96393	11.4786	9.75579	10.5687	8.0077		24.4581	26.4875	6.49413	18.9958	18.7578	30.149
2880.44	NeuAc1Hex6HexNAc5	0.163607	0.115111	0.240097	0.236724	0.175532	0.104205		0.141817	0.102581	0.141846	0.124289	0.133719	0.235519		0.309117	0.276773	0.242851	0.181035	0.0931466	0.141077		0.124378	0.192836	0.173475	0.122522	0.0708149	0.0908877
2880.44	NeuGc1Fuc1Hex5HexNAc5
2966.47	NeuAc2Fuc1Hex5HexNAc4	0.128357	0.0563248	0.146379	0.100438	0.0692839	0.0713003		0.0803559	0.0570022	0.0684354	0.0629954	0.09939	0.122669		0.0943374	0.100421	0.147499	0.0394456	0.0519365	0.058526		0.0837228	0.09111	0.0660495	0.0789981	0.0771138	0.0419277
2996.48	NeuAc1NeuGc1Fuc1Hex5HexNAc4	0.160928	0.0760324	0.134801	0.0977218	0.0585017	0.0532012		0.0800982	0.0495696	0.0449265	0.0835409	0.0664632	0.0949232		0.115271	0.105026	0.201098	0.065579	0.062605	0.0965399		0.0571892	0.0849237	0.0571319	0.0699904	0.0710556	0.0834459
3026.49	NeuGc2Fuc1Hex5HexNAc4	0.482627	0.346341	0.331578	0.243672	0.166135	0.157233		0.105385	0.112034	0.172535	0.315075	0.231433	0.32488		0.158556	0.205306	0.257589	0.110004	0.204682	0.168276		0.156775	0.121657	0.147777	0.18676	0.171472	0.233036
3054.52	Fuc1NeuAc1Hex6HexNAc5	0.0298265	0.0340223	0.0816374	0.0634414	0.0633171	0.0517592		0.0603	0.0289353	0.0444029	0.0560355	0.0369006	0.0582812		0.0619408	0.0825867	0.0423304	0.0577042	0.0214292	0.046878		0.0403564	0.0526315	0.078683	0.0305652	0.030796	0.0377858
3084.54	NeuGc1Fuc1Hex6HexNAc5	0.0802468	0.05766	0.0846945	0.110319	0.0761296	0.0484469		0.0457057	0.0585777	0.0442654	0.0430789	0.0723485	0.130612		0.0977516	0.0693819	0.115597	0	0.028803	0.0676925		0.0576438	0.0653161	0.0472399	0.040937	0.0441577	0.0658513
3084.54	NeuAc1Hex7HexNAc5
3241.61	NeuAc2Hex6HexNAc5	0.0495276	0.030067	0.0547497	0.0683749	0.0640345	0.0347222		0	0	0	0.0264581	0.0273855	0.0763212		0	0.0918808	0.0888524	0	0.0233283	0.032233		0.0452365	0	0	0.0294024	0.00768215	0.0430883
3243.48	NeuGc3Hex5HexNAc4	0.656873	0.546488	0.465053	0.549155	0.658904	0.29966		0.137095	0.156296	0.235121	0.328858	0.411165	0.691265		0.404622	0.350009	0.320354	0.147921	0.194441	0.256881		0.35633	0.4052	0.149761	0.156575	0.147413	0.252955
3258.62	NeuAc1Fuc1Hex7HexNAc5	0.115503	0.0800564	0.163153	0.184515	0.164133	0.0459127		0.0676191	0.0329439	0.0726361	0.0875445	0.0716608	0.136568		0.150765	0.142347	0.087288	0.0533331	0.0414113	0.0838907		0.0951368	0.112738	0.0611385	0.0500788	0.0438651	0.0617294
3271.62	NeuAc1NeuGc1Hex6HexNAc5	0.0473286	0.0277884	0.0635539	0.0654759	0.0705457	0.0455585		0.0634866	0.0308901	0.0397499	0	0.0203075	0.066803		0	0.0913831	0	0.0410879	0.0202501	0.0594278		0.0571114	0.0741361	0.0535157	0.0380818	0	0.0449763
3288.64	NeuGc1Fuc1Hex7HexNAc5	0.141255	0.149959	0.263661	0.335479	0.155171	0.199705		0.121323	0.0543278	0.107365	0.131311	0.166291	0.243826		0.168518	0.170374	0.284081	0.132255	0.10053	0.231546		0.223369	0.18634	0.105921	0.13344	0.0950364	0.146683
3301.63	NeuGc2Hex6HexNAc5	0.228187	0.467524	0.357368	0.467976	0.585952	0.301787		0.201821	0.131098	0.285981	0.285547	0.318292	0.568428		0.34705	0.302599	0.465165	0.133	0.202556	0.284501		0.496173	0.408976	0.180109	0.202967	0.170514	0.280639
3415.70	NeuAc2Fuc1Hex6HexNAc5	0.0417327	0	0.0274643	0.0203878	0.0208762	0		0	0.0410043	0	0	0	0		0	0	0.0546434	0	0.0122558	0.0154126		0.0418311	0	0	0	0.0406538	0
3445.71	NeuAc2Hex7HexNAc5	0	0	0.0285114	0.0219643	0.0244294	0		0	0	0	0	0.020952	0		0	0	0.119387	0.0254085	0	0.0386049		0	0.0418581	0	0	0	0
3462.72	NeuAc1Fuc1Hex8HexNAc5	0.0338548	0.0282734	0.043899	0.0312529	0.0236329	0.0140796		0	0	0	0	0	0.0400965		0.0935308	0.0294235	0	0	0.0117648	0		0.0201582	0	0.0315408	0	0.023225	0.0443442
3475.72	NeuGc2Fuc1Hex6HexNAc5	0.0308098	0.019829	0.0307257	0.0331973	0.0318058	0		0.037551	0.0214355	0	0	0.0245664	0.0409565		0	0.0161882	0.0754695	0.0333469	0.0180863	0		0.0236404	0.0226991	0	0	0.0114407	0.0417665
3492.73	NeuGc1Fuc1Hex8HexNAc5	0.0253848	0.0167618	0.0295069	0.0169229	0.0132678	0.0349036		0.0188276	0	0	0	0	0		0	0	0	0	0.0220752	0		0.0343745	0	0	0.0220129	0.0215471	0.0166833
3503.75	NeuAc1Fuc1Hex7HexNAc6	0	0	0.0168671	0	0	0		0	0	0	0	0	0.017018		0	0	0	0	0	0		0	0.0177281	0	0	0	0
3619.80	NeuAc2Fuc1Hex7HexNAc5	0.0320032	0.0129034	0.0388442	0.05083	0.0261826	0.0139031		0	0.0233166	0	0	0	0.0475283		0.0958107	0.0579154	0.0571259	0	0	0.0553063		0.0356972	0.039663	0.0304654	0	0	0
3632.79	NeuAc2NeuGc1Hex6HexNAc5	0.0275584	0.0139414	0	0.0368839	0.0260922	0		0	0.0182982	0	0	0	0		0.0917809	0.0329753	0	0	0	0		0.0255847	0.0488754	0	0.0199996	0.0357877	0
3649.81	NeuGc2Fuc2Hex6HexNAc5	0.0755809	0.0280863	0.0661971	0.0916133	0.102662	0.0522128		0.0346305	0	0.0548879	0	0	0.0604079		0.0764014	0.0887181	0.0801492	0.0556824	0.0268182	0.0629112		0.0606028	0.0699566	0.0607907	0.0263381	0.0326332	0.0331634
3660.82	NeuAc2Fuc1Hex6HexNAc6	0.0116203	0.0222521	0	0	0.0481912	0		0	0	0.0298033	0	0	0		0.0970416	0	0	0	0	0		0	0.0401219	0.0262448	0.0201976	0	0.033891
3677.84	NeuAc1Fuc2Hex7HexNAc6	0.031595	0.0278687	0.0431386	0.0438166	0.0390423	0.0277079		0	0.0128298	0.0386728	0	0.0397679	0.0570743		0.234073	0.0449996	0.031047	0	0.0292457	0.0493024		0.040476	0.0570235	0.036527	0.0213869	0.0254859	0.0283538
3692.81	NeuGc3Hex6HexNAc5	0.783903	0.591047	0.286495	0.439683	0.489268	0.618325		0.0944818	0.242655	0.343355	0.337019	0.49344	1.37921		0.0795271	0.263198	0.627957	0.120995	0.269439	0.313509		0.801124	0.547014	0.182088	0.143373	0.30053	0.718798
3776.87	NeuAc3Fuc1Hex6HexNAc5	0.062211	0.0129309	0	0.0189436	0.0217493	0.0150807		0.0243338	0	0.0397223	0	0.0292315	0		0	0	0	0.0332565	0.011364	0.0501533		0	0.055762	0.030507	0.0283101	0	0.0617849
3806.88	NeuAc2NeuGc1Fuc1Hex6HexNAc5	0	0.0236183	0.0233696	0	0.0197199	0		0	0	0	0	0.0390208	0		0.0614595	0.0329383	0	0	0	0		0	0	0.0346141	0	0.015708	0.0314456
3836.89	NeuAc1NeuGc2Fuc1Hex6HexNAc5	0.0548609	0	0.0120935	0.0273083	0	0.029894		0	0	0.0315479	0	0.0135433	0		0	0	0	0	0	0		0	0	0	0	0	0
3864.92	NeuAc2Fuc1Hex7HexNAc6	0	0.0127524	0.0249019	0	0	0		0	0.0147435	0	0	0	0		0.0558408	0	0	0	0	0		0	0.0249192	0	0.0134834	0	0
3894.94	NeuAc2Hex8HexNAc6	0	0.00311685	0	0	0	0		0	0	0.0381183	0	0	0		0.0640804	0.0358813	0	0	0	0		0	0	0	0	0	0
		100	100	100	100	100	100		100	100	100	100	100	100		100	100	100	100	100	100		100	100	100	100	100	100
		high-mannose glycans (Man3GlcNAc2-Man9GlcNAc2)
		complex-type glycans (carrying antennae that extend the core and are initiated by GlcNAc on each antennae)
		hybrid-type glycans ( only mannose residues are attached to one arm of the core and one or two antennae are on the other arm)

## Sheet: Sums
		13 weeks wt							46 weeks wt							70 weeks wt							22 months wt
		1	2	3	4	5	6		1	2	3	4	5	6		1	2	3	4	5	6		1	238	239	249	251	252
m/z	high-mannose (Man3GlcNAc2-Man9GlcNAc2)	rel area	rel area	rel area	rel area	rel area	rel area		rel area	rel area	rel area	rel area	rel area	rel area		rel area	rel area	rel area	rel area	rel area	rel area		rel area	rel area	rel area	rel area	rel area	rel area
1171.48	Hex3HexNAc2	1.17536	0.765628	1.28661	1.13193	1.51042	1.0366		1.92933	2.2851	2.58822	2.1683	1.57436	1.88659		2.08845	2.36918	2.24202	2.33586	1.59959	2.34889		1.99744	1.78719	3.01402	1.92029	2.0015	1.8775
1375.62	Hex4HexNAc2 (Man4)	1.91926	1.63593	1.93917	1.81509	2.24057	1.78186		4.06607	4.12887	4.762	3.38972	2.73857	3.04934		3.57083	3.80969	3.65824	3.60038	3.2268	4.2512		3.59722	3.2343	5.46584	3.44634	3.69082	3.17293
1579.78	Hex5HexNAc2	12.3694	9.60375	7.63929	7.23908	7.24307	8.28081		16.0683	16.6667	16.8051	14.7404	13.2325	11.3695		11.4438	12.6273	13.3034	12.9813	14.9456	16.0312		13.5697	12.3023	17.7129	15.2489	16.8555	13.2788
1783.88	Hex6HexNAc2	15.0147	10.2205	7.05274	6.33916	7.39639	7.92317		16.0132	15.4297	13.914	11.9213	12.4409	9.85979		9.87939	10.3059	10.2495	9.34133	14.0648	12.3908		11.9427	9.944	13.8013	15.3346	16.5557	12.8286
1987.98	Hex7HexNAc2	4.74729	3.2972	2.53004	2.2512	2.7592	2.35176		5.37041	4.49268	4.06711	2.95927	3.36248	2.81544		3.72102	3.47787	3.10162	3.05181	4.53701	3.75266		3.27371	3.14606	4.0117	5.2593	4.82416	3.54032
2192.08	Hex8HexNAc2	2.90954	5.12834	3.08017	2.90476	3.26671	0.509275		7.05684	5.8173	4.40964	3.39246	4.50739	3.1644		3.6299	3.33476	3.35304	3.08598	5.86039	3.65189		3.63011	3.30463	4.34873	6.86484	6.82227	4.67608
2396.18	Hex9HexNAc2	4.71593	6.44903	2.97592	2.0647	3.25022	3.26144		5.49163	4.17027	3.91423	3.45893	3.02079	3.05456		2.52221	2.59728	3.39099	2.55448	3.82526	4.50492		2.61933	3.60048	3.60097	3.69019	4.52499	2.77874
	sum	42.8515	37.1004	26.5039	23.7459	27.6666	25.1449	0	55.9957	52.9906	50.4604	42.0304	40.877	35.1996	0	36.8556	38.5219	39.2988	36.9511	48.0594	46.9316	0	40.6302	37.319	51.9556	51.7644	55.275	42.1529
	complex-type (carrying antennae that extend the core and are initiated by GlcNAc on each antennae)
1416.64	Hex3HexNAc3	1.21754	1.29017	1.81551	1.92999	2.5529	1.74046		2.38322	2.21652	2.40219	2.16583	1.8247	2.28181		2.66936	2.5712	2.6016	3.2531	1.88912	2.91999		2.07316	1.7671	2.87517	1.43288	1.42333	1.1962
1620.72	Hex4HexNAc3	1.31515	1.54988	1.72326	1.88174	1.20027	1.50655		2.16935	2.25453	2.41169	1.77867	1.9105	1.68367		2.16607	1.08591	2.31974	2.72246	1.78171	1.09073		1.99462	1.49099	3.37141	1.7618	0.818589	0.45114
1807.8	NeuGc1Hex3HexNAc3	2.18376	2.15273	3.50203	3.38168	3.94369	2.5923		2.40164	3.28202	4.11126	3.32049	3.41828	3.66675		3.94964	4.33384	3.36302	4.58325	2.92381	4.34619		3.06102	2.99541	2.9265	2.24087	2.11483	2.59233
1835.93	Fuc1Hex3HexNAc4	0.288076	0.155621	0.272731	0.237514	0.263957	0.197699		0.24945	0.249477	0.285922	0.213834	0.206386	0.282023		0.349987	0.378924	0.392449	0.440678	0.248064	0.30511		0.340075	0.20662	0.309091	0.209094	0.270863	0.263725
1865.84	Hex4HexNAc4	1.14832	1.51193	1.75264	1.79835	1.82047	1.53327		2.48662	1.93784	2.10675	1.87147	1.65782	1.72279		2.59692	2.46005	2.27426	0	1.8519	2.36694		1.66627	1.50622	2.57911	1.21024	1.1151	0.99035
2011.88	NeuGc1Hex4HexNAc3	1.72771	2.20204	2.47196	2.08846	2.60628	1.70343		2.08624	2.47005	2.60338	2.20674	2.40948	2.43371		2.40782	3.1829	2.11721	3.15998	2.22627	2.69825		2.09045	2.01199	2.09275	1.65799	1.3301	1.6959
2040.03	Fuc1Hex4HexNAc4	0.165385	0.122195	0.203046	0.197715	0.191866	0.150126		0.197848	0.229698	0.216903	0.195752	0.211607	0.220108		0.289231	0.312247	0.368125	0.418599	0.365894	0.316417		0.244881	0.19278	0.382312	0.163873	0.168538	0.212809
2070.04	Hex5HexNAc4	0.716274	1.46499	1.26655	1.2586	1.16517	1.16479		1.55495	1.08446	1.06288	1.12945	1.11671	1.16793		1.74043	1.56636	1.54133	2.08515	1.29626	1.47813		0.956481	1.00579	1.63651	0.822595	0.716927	0.519619
2081.05	Fuc1Hex3HexNAc5	0.104891	0.0434041	0.0700524	0.0771771	0.0922755	0.0484719		0.0855082	0.0814284	0.073269	0.0814209	0.0900292	0.0791067		0.14955	0.127764	0.0884027	0.0660528	0.0555756	0.0939252		0.0649461	0.0676789	0.0813329	0.073794	0.0743398	0.0905783
2111.06	Hex4HexNAc5	0.138905	0.099088	0.19176	0.201693	0.328686	0.200584		0.24283	0.136244	0.204293	0.182168	0.152194	0.237651		0.20959	0.420576	0.280232	0.222213	0.152035	0.243002		0.158695	0.144877	0.199949	0.132074	0.100241	0.100206
2244.13	Fuc1Hex5HexNAc4	0.532426	0.593143	0.858907	0.697877	0.344958	2.90803		0.694476	0.484032	0.549532	0.570748	0.701659	0.601012		0.636523	0.71716	0.7396	1.03978	0.693035	0.689289		0.464999	0.552681	0.656458	0.417336	0.458921	0.372497
2256.99	NeuGc1Hex4HexNAc4	1.13607	1.25726	3.10322	3.11349	3.53091	0.0587258		1.13016	1.31278	1.28298	1.23685	1.29067	1.41144		1.52096	1.61568	1.27762	1.68427	1.1969	1.31021		0.903906	1.03133	1.12523	0.767465	0.696974	0.766239
2285.15	Fuc1Hex4HexNAc5	0.105685	0.0498401	0.0990051	0.107075	0.0869996	0.0587239		0.106566	0.0825774	0.101202	0.0993236	0.0661802	0.113202		0.194946	0.178314	0.0919668	0.161162	0.0706331	0.128744		0.08279	0.0910711	0.136263	0.0926543	0.0756392	0.0663409
2431.21	NeuAc1Hex5HexNAc4	0.285356	0.290758	0.384951	0.316237	0.286873	0.210728		0.305089	0.281224	0.272086	0.253901	0.242811	0.30438		0.361597	0.387783	0.329462	0.521443	0.253139	0.287427		0.27457	0.299487	0.299343	0.260916	0.223927	0.219344
2448.22	Fuc1Hex6HexNAc4	1.16124	1.76693	2.05447	1.92746	0.664891	1.9262		1.52986	1.15861	1.04681	1.21185	1.54795	1.50019		1.99065	1.62266	1.90652	2.50759	1.60689	1.7537		0.966906	1.1032	1.07956	0.967482	0.817742	0.992276
2461.22	NeuGc1Hex5HexNAc4	14.4438	23.5691	16.3188	17.7597	17.1225	16.6538		13.4087	13.9554	14.371	18.2062	18.0844	17.5467		20.9752	19.898	18.9491	21.2944	17.1765	15.9507		11.3864	13.4588	14.4446	10.5455	9.37277	9.37342
2489.25	Fuc1Hex5HexNAc5	0.13311	0.115012	0.204287	0.202033	0.16628	0.130841		0.211056	0.149349	0.133104	0.182686	0.140064	0.20647		0.37141	0.26972	0.237323	0.241561	0.123694	0.172014		0.132368	0.145776	0.235822	0.0918811	0.0861285	0.113776
2605.30	NeuAc1Fuc1Hex5HexNAc4	0.130068	0.121226	0.215822	0.156727	0.115238	0.0820116		0.150644	0.108965	0.132195	0.163642	0.110537	0.135302		0.156808	0.203899	0.157556	0.169164	0.105344	0.15794		0.0936579	0.155683	0.15884	0.12319	0.0909187	0.116937
2622.31	Fuc2Hex6HexNAc4	0.138254	0.166137	0.301604	0.251419	0.194514	0.104335		0.165494	0.142565	0.128579	0.169822	0.131311	0.166101		0.222859	0.286425	0.206049	0.25315	0.130971	0.232028		0.142513	0.148131	0.155837	0.156087	0.138931	0.125837
2635.31	NeuGc1Fuc1Hex5HexNAc4	0.323839	0.350417	0.500498	0.383051	0.246876	0.237175		0.28675	0.196194	0.244832	0.283396	0.287004	0.289122		0.283633	0.422668	0.308413	0.310042	0.324236	0.29737		0.222676	0.312308	0.274503	0.284035	0.293817	0.247128
2635.31	NeuAc1Hex6HexNAc4
2652.32	Fuc1Hex7HexNAc4	0.15261	0.12595	0.1919	0.180807	0.160597	0.0873966		0.165229	0.100366	0.0971517	0.140463	0.109629	0.147523		0.186301	0.226123	0.142556	0.178626	0.135226	0.14342		0.093922	0.109021	0.135142	0.114689	0.132402	0.084867
2693.35	Fuc1Hex6HexNAc5	0.074005	0.0974735	0.139998	0.150709	0.096672	0.0778552		0.110477	0.0971716	0.100804	0.116849	0.0838498	0.116952		0.261295	0.170306	0.116082	0.168089	0.0848327	0.113974		0.08318	0.100486	0.14255	0.0669758	0.0773529	0.0574775
2792.38	NeuAc2Hex5HexNAc4	0.186458	0.173026	0.254463	0.229909	0.178283	0.129528		0.111936	0.139467	0.153943	0.130367	0.158282	0.206826		0.240427	0.291129	0.191545	0.313411	0.12037	0.172166		0.125981	0.168895	0.148833	0.138706	0.102323	0.122958
2809.40	NeuGc1Fuc2Hex5HexNAc4	0.359877	0.438325	0.689736	0.745121	0.60064	0.318369		0.389354	0.278211	0.436178	0.332487	0.409652	0.467537		0.652936	0.721287	0.538506	0.640555	0.34876	0.4433		0.329273	0.382562	0.400907	0.357786	0.213172	0.222358
2809.40	NeuAc1Fuc1Hex6HexNAc4
2822.39	NeuAc1NeuGc1Hex5HexNAc4	0.377919	0.368838	0.357471	0.435501	0.403888	0.238646		0.224089	0.226477	0.218804	0.297178	0.27863	0.352414		0.385656	0.47921	0.24976	0.38977	0.204853	0.27399		0.227014	0.259257	0.250822	0.210591	0.153681	0.208945
2839.41	NeuGc1Fuc1Hex6HexNAc4	4.43816	3.04202	3.31669	3.707	1.16543	2.84595		2.09007	1.68393	1.51991	2.7722	4.01242	2.871		2.69538	2.71344	2.9599	3.0884	2.79245	2.67569		2.28029	1.95875	1.44506	1.75415	1.56954	2.26029
2852.40	NeuGc2Hex5HexNAc4	19.1701	15.6173	26.7327	28.1678	28.338	34.5258		5.83608	9.568	9.48851	14.9627	14.5485	18.5205		10.3623	9.96393	11.4786	9.75579	10.5687	8.0077		24.4581	26.4875	6.49413	18.9958	18.7578	30.149
2880.44	NeuAc1Hex6HexNAc5	0.163607	0.115111	0.240097	0.236724	0.175532	0.104205		0.141817	0.102581	0.141846	0.124289	0.133719	0.235519		0.309117	0.276773	0.242851	0.181035	0.0931466	0.141077		0.124378	0.192836	0.173475	0.122522	0.0708149	0.0908877
2880.44	NeuGc1Fuc1Hex5HexNAc5
2966.47	NeuAc2Fuc1Hex5HexNAc4	0.128357	0.0563248	0.146379	0.100438	0.0692839	0.0713003		0.0803559	0.0570022	0.0684354	0.0629954	0.09939	0.122669		0.0943374	0.100421	0.147499	0.0394456	0.0519365	0.058526		0.0837228	0.09111	0.0660495	0.0789981	0.0771138	0.0419277
2996.48	NeuAc1NeuGc1Fuc1Hex5HexNAc4	0.160928	0.0760324	0.134801	0.0977218	0.0585017	0.0532012		0.0800982	0.0495696	0.0449265	0.0835409	0.0664632	0.0949232		0.115271	0.105026	0.201098	0.065579	0.062605	0.0965399		0.0571892	0.0849237	0.0571319	0.0699904	0.0710556	0.0834459
3026.49	NeuGc2Fuc1Hex5HexNAc4	0.482627	0.346341	0.331578	0.243672	0.166135	0.157233		0.105385	0.112034	0.172535	0.315075	0.231433	0.32488		0.158556	0.205306	0.257589	0.110004	0.204682	0.168276		0.156775	0.121657	0.147777	0.18676	0.171472	0.233036
3054.52	Fuc1NeuAc1Hex6HexNAc5	0.0298265	0.0340223	0.0816374	0.0634414	0.0633171	0.0517592		0.0603	0.0289353	0.0444029	0.0560355	0.0369006	0.0582812		0.0619408	0.0825867	0.0423304	0.0577042	0.0214292	0.046878		0.0403564	0.0526315	0.078683	0.0305652	0.030796	0.0377858
3084.54	NeuGc1Fuc1Hex6HexNAc5	0.0802468	0.05766	0.0846945	0.110319	0.0761296	0.0484469		0.0457057	0.0585777	0.0442654	0.0430789	0.0723485	0.130612		0.0977516	0.0693819	0.115597	0	0.028803	0.0676925		0.0576438	0.0653161	0.0472399	0.040937	0.0441577	0.0658513
3084.54	NeuAc1Hex7HexNAc5
3241.61	NeuAc2Hex6HexNAc5	0.0495276	0.030067	0.0547497	0.0683749	0.0640345	0.0347222		0	0	0	0.0264581	0.0273855	0.0763212		0	0.0918808	0.0888524	0	0.0233283	0.032233		0.0452365	0	0	0.0294024	0.00768215	0.0430883
3243.48	NeuGc3Hex5HexNAc4	0.656873	0.546488	0.465053	0.549155	0.658904	0.29966		0.137095	0.156296	0.235121	0.328858	0.411165	0.691265		0.404622	0.350009	0.320354	0.147921	0.194441	0.256881		0.35633	0.4052	0.149761	0.156575	0.147413	0.252955
3258.62	NeuAc1Fuc1Hex7HexNAc5	0.115503	0.0800564	0.163153	0.184515	0.164133	0.0459127		0.0676191	0.0329439	0.0726361	0.0875445	0.0716608	0.136568		0.150765	0.142347	0.087288	0.0533331	0.0414113	0.0838907		0.0951368	0.112738	0.0611385	0.0500788	0.0438651	0.0617294
3271.62	NeuAc1NeuGc1Hex6HexNAc5	0.0473286	0.0277884	0.0635539	0.0654759	0.0705457	0.0455585		0.0634866	0.0308901	0.0397499	0	0.0203075	0.066803		0	0.0913831	0	0.0410879	0.0202501	0.0594278		0.0571114	0.0741361	0.0535157	0.0380818	0	0.0449763
3288.64	NeuGc1Fuc1Hex7HexNAc5	0.141255	0.149959	0.263661	0.335479	0.155171	0.199705		0.121323	0.0543278	0.107365	0.131311	0.166291	0.243826		0.168518	0.170374	0.284081	0.132255	0.10053	0.231546		0.223369	0.18634	0.105921	0.13344	0.0950364	0.146683
3301.63	NeuGc2Hex6HexNAc5	0.228187	0.467524	0.357368	0.467976	0.585952	0.301787		0.201821	0.131098	0.285981	0.285547	0.318292	0.568428		0.34705	0.302599	0.465165	0.133	0.202556	0.284501		0.496173	0.408976	0.180109	0.202967	0.170514	0.280639
3415.70	NeuAc2Fuc1Hex6HexNAc5	0.0417327	0	0.0274643	0.0203878	0.0208762	0		0	0.0410043	0	0	0	0		0	0	0.0546434	0	0.0122558	0.0154126		0.0418311	0	0	0	0.0406538	0
3445.71	NeuAc2Hex7HexNAc5	0	0	0.0285114	0.0219643	0.0244294	0		0	0	0	0	0.020952	0		0	0	0.119387	0.0254085	0	0.0386049		0	0.0418581	0	0	0	0
3462.72	NeuAc1Fuc1Hex8HexNAc5	0.0338548	0.0282734	0.043899	0.0312529	0.0236329	0.0140796		0	0	0	0	0	0.0400965		0.0935308	0.0294235	0	0	0.0117648	0		0.0201582	0	0.0315408	0	0.023225	0.0443442
3475.72	NeuGc2Fuc1Hex6HexNAc5	0.0308098	0.019829	0.0307257	0.0331973	0.0318058	0		0.037551	0.0214355	0	0	0.0245664	0.0409565		0	0.0161882	0.0754695	0.0333469	0.0180863	0		0.0236404	0.0226991	0	0	0.0114407	0.0417665
3492.73	NeuGc1Fuc1Hex8HexNAc5	0.0253848	0.0167618	0.0295069	0.0169229	0.0132678	0.0349036		0.0188276	0	0	0	0	0		0	0	0	0	0.0220752	0		0.0343745	0	0	0.0220129	0.0215471	0.0166833
3503.75	NeuAc1Fuc1Hex7HexNAc6	0	0	0.0168671	0	0	0		0	0	0	0	0	0.017018		0	0	0	0	0	0		0	0.0177281	0	0	0	0
3619.80	NeuAc2Fuc1Hex7HexNAc5	0.0320032	0.0129034	0.0388442	0.05083	0.0261826	0.0139031		0	0.0233166	0	0	0	0.0475283		0.0958107	0.0579154	0.0571259	0	0	0.0553063		0.0356972	0.039663	0.0304654	0	0	0
3632.79	NeuAc2NeuGc1Hex6HexNAc5	0.0275584	0.0139414	0	0.0368839	0.0260922	0		0	0.0182982	0	0	0	0		0.0917809	0.0329753	0	0	0	0		0.0255847	0.0488754	0	0.0199996	0.0357877	0
3649.81	NeuGc2Fuc2Hex6HexNAc5	0.0755809	0.0280863	0.0661971	0.0916133	0.102662	0.0522128		0.0346305	0	0.0548879	0	0	0.0604079		0.0764014	0.0887181	0.0801492	0.0556824	0.0268182	0.0629112		0.0606028	0.0699566	0.0607907	0.0263381	0.0326332	0.0331634
3660.82	NeuAc2Fuc1Hex6HexNAc6	0.0116203	0.0222521	0	0	0.0481912	0		0	0	0.0298033	0	0	0		0.0970416	0	0	0	0	0		0	0.0401219	0.0262448	0.0201976	0	0.033891
3677.84	NeuAc1Fuc2Hex7HexNAc6	0.031595	0.0278687	0.0431386	0.0438166	0.0390423	0.0277079		0	0.0128298	0.0386728	0	0.0397679	0.0570743		0.234073	0.0449996	0.031047	0	0.0292457	0.0493024		0.040476	0.0570235	0.036527	0.0213869	0.0254859	0.0283538
3692.81	NeuGc3Hex6HexNAc5	0.783903	0.591047	0.286495	0.439683	0.489268	0.618325		0.0944818	0.242655	0.343355	0.337019	0.49344	1.37921		0.0795271	0.263198	0.627957	0.120995	0.269439	0.313509		0.801124	0.547014	0.182088	0.143373	0.30053	0.718798
3776.87	NeuAc3Fuc1Hex6HexNAc5	0.062211	0.0129309	0	0.0189436	0.0217493	0.0150807		0.0243338	0	0.0397223	0	0.0292315	0		0	0	0	0.0332565	0.011364	0.0501533		0	0.055762	0.030507	0.0283101	0	0.0617849
3806.88	NeuAc2NeuGc1Fuc1Hex6HexNAc5	0	0.0236183	0.0233696	0	0.0197199	0		0	0	0	0	0.0390208	0		0.0614595	0.0329383	0	0	0	0		0	0	0.0346141	0	0.015708	0.0314456
3836.89	NeuAc1NeuGc2Fuc1Hex6HexNAc5	0.0548609	0	0.0120935	0.0273083	0	0.029894		0	0	0.0315479	0	0.0135433	0		0	0	0	0	0	0		0	0	0	0	0	0
3864.92	NeuAc2Fuc1Hex7HexNAc6	0	0.0127524	0.0249019	0	0	0		0	0.0147435	0	0	0	0		0.0558408	0	0	0	0	0		0	0.0249192	0	0.0134834	0	0
3894.94	NeuAc2Hex8HexNAc6	0	0.00311685	0	0	0	0		0	0	0.0381183	0	0	0		0.0640804	0.0358813	0	0	0	0		0	0	0	0	0	0
	sum	55.6504	61.5356	72.0529	74.941	71.0637	73.6514	0	42.0885	45.0961	47.5895	56.1582	57.5171	63.1246	0	60.8849	59.1978	58.5254	60.8988	50.1734	50.781	0	57.796	60.9159	45.5916	46.4859	42.8318	56.0057
	fucosylated glycans (all structures carrying fucose)
1345.55	Fuc1Hex3HexNAc2	0.692527	0.426931	0.569462	0.537624	0.557115	0.498259		0.901072	0.987044	1.08736	0.97331	0.798428	0.809652		0.984994	1.14867	1.1992	0.983766	0.929401	1.23088		0.838561	0.957616	1.39648	0.99504	1.21988	1.19257
1835.93	Fuc1Hex3HexNAc4	0.288076	0.155621	0.272731	0.237514	0.263957	0.197699		0.24945	0.249477	0.285922	0.213834	0.206386	0.282023		0.349987	0.378924	0.392449	0.440678	0.248064	0.30511		0.340075	0.20662	0.309091	0.209094	0.270863	0.263725
2040.03	Fuc1Hex4HexNAc4	0.165385	0.122195	0.203046	0.197715	0.191866	0.150126		0.197848	0.229698	0.216903	0.195752	0.211607	0.220108		0.289231	0.312247	0.368125	0.418599	0.365894	0.316417		0.244881	0.19278	0.382312	0.163873	0.168538	0.212809
2081.05	Fuc1Hex3HexNAc5	0.104891	0.0434041	0.0700524	0.0771771	0.0922755	0.0484719		0.0855082	0.0814284	0.073269	0.0814209	0.0900292	0.0791067		0.14955	0.127764	0.0884027	0.0660528	0.0555756	0.0939252		0.0649461	0.0676789	0.0813329	0.073794	0.0743398	0.0905783
2244.13	Fuc1Hex5HexNAc4	0.532426	0.593143	0.858907	0.697877	0.344958	2.90803		0.694476	0.484032	0.549532	0.570748	0.701659	0.601012		0.636523	0.71716	0.7396	1.03978	0.693035	0.689289		0.464999	0.552681	0.656458	0.417336	0.458921	0.372497
2285.15	Fuc1Hex4HexNAc5	0.105685	0.0498401	0.0990051	0.107075	0.0869996	0.0587239		0.106566	0.0825774	0.101202	0.0993236	0.0661802	0.113202		0.194946	0.178314	0.0919668	0.161162	0.0706331	0.128744		0.08279	0.0910711	0.136263	0.0926543	0.0756392	0.0663409
2448.22	Fuc1Hex6HexNAc4	1.16124	1.76693	2.05447	1.92746	0.664891	1.9262		1.52986	1.15861	1.04681	1.21185	1.54795	1.50019		1.99065	1.62266	1.90652	2.50759	1.60689	1.7537		0.966906	1.1032	1.07956	0.967482	0.817742	0.992276
2489.25	Fuc1Hex5HexNAc5	0.13311	0.115012	0.204287	0.202033	0.16628	0.130841		0.211056	0.149349	0.133104	0.182686	0.140064	0.20647		0.37141	0.26972	0.237323	0.241561	0.123694	0.172014		0.132368	0.145776	0.235822	0.0918811	0.0861285	0.113776
2605.30	NeuAc1Fuc1Hex5HexNAc4	0.130068	0.121226	0.215822	0.156727	0.115238	0.0820116		0.150644	0.108965	0.132195	0.163642	0.110537	0.135302		0.156808	0.203899	0.157556	0.169164	0.105344	0.15794		0.0936579	0.155683	0.15884	0.12319	0.0909187	0.116937
2622.31	Fuc2Hex6HexNAc4	0.138254	0.166137	0.301604	0.251419	0.194514	0.104335		0.165494	0.142565	0.128579	0.169822	0.131311	0.166101		0.222859	0.286425	0.206049	0.25315	0.130971	0.232028		0.142513	0.148131	0.155837	0.156087	0.138931	0.125837
2635.31	NeuGc1Fuc1Hex5HexNAc4	0.323839	0.350417	0.500498	0.383051	0.246876	0.237175		0.28675	0.196194	0.244832	0.283396	0.287004	0.289122		0.283633	0.422668	0.308413	0.310042	0.324236	0.29737		0.222676	0.312308	0.274503	0.284035	0.293817	0.247128
2652.32	Fuc1Hex7HexNAc4	0.15261	0.12595	0.1919	0.180807	0.160597	0.0873966		0.165229	0.100366	0.0971517	0.140463	0.109629	0.147523		0.186301	0.226123	0.142556	0.178626	0.135226	0.14342		0.093922	0.109021	0.135142	0.114689	0.132402	0.084867
2693.35	Fuc1Hex6HexNAc5	0.074005	0.0974735	0.139998	0.150709	0.096672	0.0778552		0.110477	0.0971716	0.100804	0.116849	0.0838498	0.116952		0.261295	0.170306	0.116082	0.168089	0.0848327	0.113974		0.08318	0.100486	0.14255	0.0669758	0.0773529	0.0574775
2809.40	NeuGc1Fuc2Hex5HexNAc4	0.359877	0.438325	0.689736	0.745121	0.60064	0.318369		0.389354	0.278211	0.436178	0.332487	0.409652	0.467537		0.652936	0.721287	0.538506	0.640555	0.34876	0.4433		0.329273	0.382562	0.400907	0.357786	0.213172	0.222358
2809.40	NeuAc1Fuc1Hex6HexNAc4
2839.41	NeuGc1Fuc1Hex6HexNAc4	4.43816	3.04202	3.31669	3.707	1.16543	2.84595		2.09007	1.68393	1.51991	2.7722	4.01242	2.871		2.69538	2.71344	2.9599	3.0884	2.79245	2.67569		2.28029	1.95875	1.44506	1.75415	1.56954	2.26029
2880.44	NeuGc1Fuc1Hex5HexNAc5
2966.47	NeuAc2Fuc1Hex5HexNAc4	0.128357	0.0563248	0.146379	0.100438	0.0692839	0.0713003		0.0803559	0.0570022	0.0684354	0.0629954	0.09939	0.122669		0.0943374	0.100421	0.147499	0.0394456	0.0519365	0.058526		0.0837228	0.09111	0.0660495	0.0789981	0.0771138	0.0419277
2996.48	NeuAc1NeuGc1Fuc1Hex5HexNAc4	0.160928	0.0760324	0.134801	0.0977218	0.0585017	0.0532012		0.0800982	0.0495696	0.0449265	0.0835409	0.0664632	0.0949232		0.115271	0.105026	0.201098	0.065579	0.062605	0.0965399		0.0571892	0.0849237	0.0571319	0.0699904	0.0710556	0.0834459
3026.49	NeuGc2Fuc1Hex5HexNAc4	0.482627	0.346341	0.331578	0.243672	0.166135	0.157233		0.105385	0.112034	0.172535	0.315075	0.231433	0.32488		0.158556	0.205306	0.257589	0.110004	0.204682	0.168276		0.156775	0.121657	0.147777	0.18676	0.171472	0.233036
3054.52	Fuc1NeuAc1Hex6HexNAc5	0.0298265	0.0340223	0.0816374	0.0634414	0.0633171	0.0517592		0.0603	0.0289353	0.0444029	0.0560355	0.0369006	0.0582812		0.0619408	0.0825867	0.0423304	0.0577042	0.0214292	0.046878		0.0403564	0.0526315	0.078683	0.0305652	0.030796	0.0377858
3084.54	NeuGc1Fuc1Hex6HexNAc5	0.0802468	0.05766	0.0846945	0.110319	0.0761296	0.0484469		0.0457057	0.0585777	0.0442654	0.0430789	0.0723485	0.130612		0.0977516	0.0693819	0.115597	0	0.028803	0.0676925		0.0576438	0.0653161	0.0472399	0.040937	0.0441577	0.0658513
3258.62	NeuAc1Fuc1Hex7HexNAc5	0.115503	0.0800564	0.163153	0.184515	0.164133	0.0459127		0.0676191	0.0329439	0.0726361	0.0875445	0.0716608	0.136568		0.150765	0.142347	0.087288	0.0533331	0.0414113	0.0838907		0.0951368	0.112738	0.0611385	0.0500788	0.0438651	0.0617294
3271.62	NeuAc1NeuGc1Hex6HexNAc5	0.0473286	0.0277884	0.0635539	0.0654759	0.0705457	0.0455585		0.0634866	0.0308901	0.0397499	0	0.0203075	0.066803		0	0.0913831	0	0.0410879	0.0202501	0.0594278		0.0571114	0.0741361	0.0535157	0.0380818	0	0.0449763
3288.64	NeuGc1Fuc1Hex7HexNAc5	0.141255	0.149959	0.263661	0.335479	0.155171	0.199705		0.121323	0.0543278	0.107365	0.131311	0.166291	0.243826		0.168518	0.170374	0.284081	0.132255	0.10053	0.231546		0.223369	0.18634	0.105921	0.13344	0.0950364	0.146683
3415.70	NeuAc2Fuc1Hex6HexNAc5	0.0417327	0	0.0274643	0.0203878	0.0208762	0		0	0.0410043	0	0	0	0		0	0	0.0546434	0	0.0122558	0.0154126		0.0418311	0	0	0	0.0406538	0
3462.72	NeuAc1Fuc1Hex8HexNAc5	0.0338548	0.0282734	0.043899	0.0312529	0.0236329	0.0140796		0	0	0	0	0	0.0400965		0.0935308	0.0294235	0	0	0.0117648	0		0.0201582	0	0.0315408	0	0.023225	0.0443442
3475.72	NeuGc2Fuc1Hex6HexNAc5	0.0308098	0.019829	0.0307257	0.0331973	0.0318058	0		0.037551	0.0214355	0	0	0.0245664	0.0409565		0	0.0161882	0.0754695	0.0333469	0.0180863	0		0.0236404	0.0226991	0	0	0.0114407	0.0417665
3492.73	NeuGc1Fuc1Hex8HexNAc5	0.0253848	0.0167618	0.0295069	0.0169229	0.0132678	0.0349036		0.0188276	0	0	0	0	0		0	0	0	0	0.0220752	0		0.0343745	0	0	0.0220129	0.0215471	0.0166833
3503.75	NeuAc1Fuc1Hex7HexNAc6	0	0	0.0168671	0	0	0		0	0	0	0	0	0.017018		0	0	0	0	0	0		0	0.0177281	0	0	0	0
3619.80	NeuAc2Fuc1Hex7HexNAc5	0.0320032	0.0129034	0.0388442	0.05083	0.0261826	0.0139031		0	0.0233166	0	0	0	0.0475283		0.0958107	0.0579154	0.0571259	0	0	0.0553063		0.0356972	0.039663	0.0304654	0	0	0
3649.81	NeuGc2Fuc2Hex6HexNAc5	0.0755809	0.0280863	0.0661971	0.0916133	0.102662	0.0522128		0.0346305	0	0.0548879	0	0	0.0604079		0.0764014	0.0887181	0.0801492	0.0556824	0.0268182	0.0629112		0.0606028	0.0699566	0.0607907	0.0263381	0.0326332	0.0331634
3660.82	NeuAc2Fuc1Hex6HexNAc6	0.0116203	0.0222521	0	0	0.0481912	0		0	0	0.0298033	0	0	0		0.0970416	0	0	0	0	0		0	0.0401219	0.0262448	0.0201976	0	0.033891
3677.84	NeuAc1Fuc2Hex7HexNAc6	0.031595	0.0278687	0.0431386	0.0438166	0.0390423	0.0277079		0	0.0128298	0.0386728	0	0.0397679	0.0570743		0.234073	0.0449996	0.031047	0	0.0292457	0.0493024		0.040476	0.0570235	0.036527	0.0213869	0.0254859	0.0283538
3776.87	NeuAc3Fuc1Hex6HexNAc5	0.062211	0.0129309	0	0.0189436	0.0217493	0.0150807		0.0243338	0	0.0397223	0	0.0292315	0		0	0	0	0.0332565	0.011364	0.0501533		0	0.055762	0.030507	0.0283101	0	0.0617849
3806.88	NeuAc2NeuGc1Fuc1Hex6HexNAc5	0	0.0236183	0.0233696	0	0.0197199	0		0	0	0	0	0.0390208	0		0.0614595	0.0329383	0	0	0	0		0	0	0.0346141	0	0.015708	0.0314456
3836.89	NeuAc1NeuGc2Fuc1Hex6HexNAc5	0.0548609	0	0.0120935	0.0273083	0	0.029894		0	0	0.0315479	0	0.0135433	0		0	0	0	0	0	0		0	0	0	0	0	0
3864.92	NeuAc2Fuc1Hex7HexNAc6	0	0.0127524	0.0249019	0	0	0		0	0.0147435	0	0	0	0		0.0558408	0	0	0	0	0		0	0.0249192	0	0.0134834	0	0
	sum	10.3859	8.64809	11.3147	11.0946	6.11865	10.5323	0	8.07348	6.56723	6.9427	8.28737	9.81764	9.44694	0	10.9878	10.7366	10.8866	11.2889	8.67827	9.79967	0	7.40912	7.60109	7.85831	6.62865	6.39238	7.42633
	sialylated (all structures carrying sialic acid (NeuGc or NeuAc))
1807.8	NeuGc1Hex3HexNAc3	2.18376	2.15273	3.50203	3.38168	3.94369	2.5923		2.40164	3.28202	4.11126	3.32049	3.41828	3.66675		3.94964	4.33384	3.36302	4.58325	2.92381	4.34619		3.06102	2.99541	2.9265	2.24087	2.11483	2.59233
2011.88	NeuGc1Hex4HexNAc3	1.72771	2.20204	2.47196	2.08846	2.60628	1.70343		2.08624	2.47005	2.60338	2.20674	2.40948	2.43371		2.40782	3.1829	2.11721	3.15998	2.22627	2.69825		2.09045	2.01199	2.09275	1.65799	1.3301	1.6959
2256.99	NeuGc1Hex4HexNAc4	1.13607	1.25726	3.10322	3.11349	3.53091	0.0587258		1.13016	1.31278	1.28298	1.23685	1.29067	1.41144		1.52096	1.61568	1.27762	1.68427	1.1969	1.31021		0.903906	1.03133	1.12523	0.767465	0.696974	0.766239
2431.21	NeuAc1Hex5HexNAc4	0.285356	0.290758	0.384951	0.316237	0.286873	0.210728		0.305089	0.281224	0.272086	0.253901	0.242811	0.30438		0.361597	0.387783	0.329462	0.521443	0.253139	0.287427		0.27457	0.299487	0.299343	0.260916	0.223927	0.219344
2461.22	NeuGc1Hex5HexNAc4	14.4438	23.5691	16.3188	17.7597	17.1225	16.6538		13.4087	13.9554	14.371	18.2062	18.0844	17.5467		20.9752	19.898	18.9491	21.2944	17.1765	15.9507		11.3864	13.4588	14.4446	10.5455	9.37277	9.37342
2605.30	NeuAc1Fuc1Hex5HexNAc4	0.130068	0.121226	0.215822	0.156727	0.115238	0.0820116		0.150644	0.108965	0.132195	0.163642	0.110537	0.135302		0.156808	0.203899	0.157556	0.169164	0.105344	0.15794		0.0936579	0.155683	0.15884	0.12319	0.0909187	0.116937
2635.31	NeuGc1Fuc1Hex5HexNAc4	0.323839	0.350417	0.500498	0.383051	0.246876	0.237175		0.28675	0.196194	0.244832	0.283396	0.287004	0.289122		0.283633	0.422668	0.308413	0.310042	0.324236	0.29737		0.222676	0.312308	0.274503	0.284035	0.293817	0.247128
2635.31	NeuAc1Hex6HexNAc4
2792.38	NeuAc2Hex5HexNAc4	0.186458	0.173026	0.254463	0.229909	0.178283	0.129528		0.111936	0.139467	0.153943	0.130367	0.158282	0.206826		0.240427	0.291129	0.191545	0.313411	0.12037	0.172166		0.125981	0.168895	0.148833	0.138706	0.102323	0.122958
2809.40	NeuGc1Fuc2Hex5HexNAc4	0.359877	0.438325	0.689736	0.745121	0.60064	0.318369		0.389354	0.278211	0.436178	0.332487	0.409652	0.467537		0.652936	0.721287	0.538506	0.640555	0.34876	0.4433		0.329273	0.382562	0.400907	0.357786	0.213172	0.222358
2809.40	NeuAc1Fuc1Hex6HexNAc4
2822.39	NeuAc1NeuGc1Hex5HexNAc4	0.377919	0.368838	0.357471	0.435501	0.403888	0.238646		0.224089	0.226477	0.218804	0.297178	0.27863	0.352414		0.385656	0.47921	0.24976	0.38977	0.204853	0.27399		0.227014	0.259257	0.250822	0.210591	0.153681	0.208945
2839.41	NeuGc1Fuc1Hex6HexNAc4	4.43816	3.04202	3.31669	3.707	1.16543	2.84595		2.09007	1.68393	1.51991	2.7722	4.01242	2.871		2.69538	2.71344	2.9599	3.0884	2.79245	2.67569		2.28029	1.95875	1.44506	1.75415	1.56954	2.26029
2852.40	NeuGc2Hex5HexNAc4	19.1701	15.6173	26.7327	28.1678	28.338	34.5258		5.83608	9.568	9.48851	14.9627	14.5485	18.5205		10.3623	9.96393	11.4786	9.75579	10.5687	8.0077		24.4581	26.4875	6.49413	18.9958	18.7578	30.149
2880.44	NeuAc1Hex6HexNAc5	0.163607	0.115111	0.240097	0.236724	0.175532	0.104205		0.141817	0.102581	0.141846	0.124289	0.133719	0.235519		0.309117	0.276773	0.242851	0.181035	0.0931466	0.141077		0.124378	0.192836	0.173475	0.122522	0.0708149	0.0908877
2880.44	NeuGc1Fuc1Hex5HexNAc5
2966.47	NeuAc2Fuc1Hex5HexNAc4	0.128357	0.0563248	0.146379	0.100438	0.0692839	0.0713003		0.0803559	0.0570022	0.0684354	0.0629954	0.09939	0.122669		0.0943374	0.100421	0.147499	0.0394456	0.0519365	0.058526		0.0837228	0.09111	0.0660495	0.0789981	0.0771138	0.0419277
2996.48	NeuAc1NeuGc1Fuc1Hex5HexNAc4	0.160928	0.0760324	0.134801	0.0977218	0.0585017	0.0532012		0.0800982	0.0495696	0.0449265	0.0835409	0.0664632	0.0949232		0.115271	0.105026	0.201098	0.065579	0.062605	0.0965399		0.0571892	0.0849237	0.0571319	0.0699904	0.0710556	0.0834459
3026.49	NeuGc2Fuc1Hex5HexNAc4	0.482627	0.346341	0.331578	0.243672	0.166135	0.157233		0.105385	0.112034	0.172535	0.315075	0.231433	0.32488		0.158556	0.205306	0.257589	0.110004	0.204682	0.168276		0.156775	0.121657	0.147777	0.18676	0.171472	0.233036
3054.52	Fuc1NeuAc1Hex6HexNAc5	0.0298265	0.0340223	0.0816374	0.0634414	0.0633171	0.0517592		0.0603	0.0289353	0.0444029	0.0560355	0.0369006	0.0582812		0.0619408	0.0825867	0.0423304	0.0577042	0.0214292	0.046878		0.0403564	0.0526315	0.078683	0.0305652	0.030796	0.0377858
3084.54	NeuGc1Fuc1Hex6HexNAc5	0.0802468	0.05766	0.0846945	0.110319	0.0761296	0.0484469		0.0457057	0.0585777	0.0442654	0.0430789	0.0723485	0.130612		0.0977516	0.0693819	0.115597	0	0.028803	0.0676925		0.0576438	0.0653161	0.0472399	0.040937	0.0441577	0.0658513
3084.54	NeuAc1Hex7HexNAc5
3241.61	NeuAc2Hex6HexNAc5	0.0495276	0.030067	0.0547497	0.0683749	0.0640345	0.0347222		0	0	0	0.0264581	0.0273855	0.0763212		0	0.0918808	0.0888524	0	0.0233283	0.032233		0.0452365	0	0	0.0294024	0.00768215	0.0430883
3243.48	NeuGc3Hex5HexNAc4	0.656873	0.546488	0.465053	0.549155	0.658904	0.29966		0.137095	0.156296	0.235121	0.328858	0.411165	0.691265		0.404622	0.350009	0.320354	0.147921	0.194441	0.256881		0.35633	0.4052	0.149761	0.156575	0.147413	0.252955
3258.62	NeuAc1Fuc1Hex7HexNAc5	0.115503	0.0800564	0.163153	0.184515	0.164133	0.0459127		0.0676191	0.0329439	0.0726361	0.0875445	0.0716608	0.136568		0.150765	0.142347	0.087288	0.0533331	0.0414113	0.0838907		0.0951368	0.112738	0.0611385	0.0500788	0.0438651	0.0617294
3271.62	NeuAc1NeuGc1Hex6HexNAc5	0.0473286	0.0277884	0.0635539	0.0654759	0.0705457	0.0455585		0.0634866	0.0308901	0.0397499	0	0.0203075	0.066803		0	0.0913831	0	0.0410879	0.0202501	0.0594278		0.0571114	0.0741361	0.0535157	0.0380818	0	0.0449763
3288.64	NeuGc1Fuc1Hex7HexNAc5	0.141255	0.149959	0.263661	0.335479	0.155171	0.199705		0.121323	0.0543278	0.107365	0.131311	0.166291	0.243826		0.168518	0.170374	0.284081	0.132255	0.10053	0.231546		0.223369	0.18634	0.105921	0.13344	0.0950364	0.146683
3301.63	NeuGc2Hex6HexNAc5	0.228187	0.467524	0.357368	0.467976	0.585952	0.301787		0.201821	0.131098	0.285981	0.285547	0.318292	0.568428		0.34705	0.302599	0.465165	0.133	0.202556	0.284501		0.496173	0.408976	0.180109	0.202967	0.170514	0.280639
3415.70	NeuAc2Fuc1Hex6HexNAc5	0.0417327	0	0.0274643	0.0203878	0.0208762	0		0	0.0410043	0	0	0	0		0	0	0.0546434	0	0.0122558	0.0154126		0.0418311	0	0	0	0.0406538	0
3445.71	NeuAc2Hex7HexNAc5	0	0	0.0285114	0.0219643	0.0244294	0		0	0	0	0	0.020952	0		0	0	0.119387	0.0254085	0	0.0386049		0	0.0418581	0	0	0	0
3462.72	NeuAc1Fuc1Hex8HexNAc5	0.0338548	0.0282734	0.043899	0.0312529	0.0236329	0.0140796		0	0	0	0	0	0.0400965		0.0935308	0.0294235	0	0	0.0117648	0		0.0201582	0	0.0315408	0	0.023225	0.0443442
3475.72	NeuGc2Fuc1Hex6HexNAc5	0.0308098	0.019829	0.0307257	0.0331973	0.0318058	0		0.037551	0.0214355	0	0	0.0245664	0.0409565		0	0.0161882	0.0754695	0.0333469	0.0180863	0		0.0236404	0.0226991	0	0	0.0114407	0.0417665
3492.73	NeuGc1Fuc1Hex8HexNAc5	0.0253848	0.0167618	0.0295069	0.0169229	0.0132678	0.0349036		0.0188276	0	0	0	0	0		0	0	0	0	0.0220752	0		0.0343745	0	0	0.0220129	0.0215471	0.0166833
3503.75	NeuAc1Fuc1Hex7HexNAc6	0	0	0.0168671	0	0	0		0	0	0	0	0	0.017018		0	0	0	0	0	0		0	0.0177281	0	0	0	0
3619.80	NeuAc2Fuc1Hex7HexNAc5	0.0320032	0.0129034	0.0388442	0.05083	0.0261826	0.0139031		0	0.0233166	0	0	0	0.0475283		0.0958107	0.0579154	0.0571259	0	0	0.0553063		0.0356972	0.039663	0.0304654	0	0	0
3632.79	NeuAc2NeuGc1Hex6HexNAc5	0.0275584	0.0139414	0	0.0368839	0.0260922	0		0	0.0182982	0	0	0	0		0.0917809	0.0329753	0	0	0	0		0.0255847	0.0488754	0	0.0199996	0.0357877	0
3649.81	NeuGc2Fuc2Hex6HexNAc5	0.0755809	0.0280863	0.0661971	0.0916133	0.102662	0.0522128		0.0346305	0	0.0548879	0	0	0.0604079		0.0764014	0.0887181	0.0801492	0.0556824	0.0268182	0.0629112		0.0606028	0.0699566	0.0607907	0.0263381	0.0326332	0.0331634
3660.82	NeuAc2Fuc1Hex6HexNAc6	0.0116203	0.0222521	0	0	0.0481912	0		0	0	0.0298033	0	0	0		0.0970416	0	0	0	0	0		0	0.0401219	0.0262448	0.0201976	0	0.033891
3677.84	NeuAc1Fuc2Hex7HexNAc6	0.031595	0.0278687	0.0431386	0.0438166	0.0390423	0.0277079		0	0.0128298	0.0386728	0	0.0397679	0.0570743		0.234073	0.0449996	0.031047	0	0.0292457	0.0493024		0.040476	0.0570235	0.036527	0.0213869	0.0254859	0.0283538
3692.81	NeuGc3Hex6HexNAc5	0.783903	0.591047	0.286495	0.439683	0.489268	0.618325		0.0944818	0.242655	0.343355	0.337019	0.49344	1.37921		0.0795271	0.263198	0.627957	0.120995	0.269439	0.313509		0.801124	0.547014	0.182088	0.143373	0.30053	0.718798
3776.87	NeuAc3Fuc1Hex6HexNAc5	0.062211	0.0129309	0	0.0189436	0.0217493	0.0150807		0.0243338	0	0.0397223	0	0.0292315	0		0	0	0	0.0332565	0.011364	0.0501533		0	0.055762	0.030507	0.0283101	0	0.0617849
3806.88	NeuAc2NeuGc1Fuc1Hex6HexNAc5	0	0.0236183	0.0233696	0	0.0197199	0		0	0	0	0	0.0390208	0		0.0614595	0.0329383	0	0	0	0		0	0	0.0346141	0	0.015708	0.0314456
3836.89	NeuAc1NeuGc2Fuc1Hex6HexNAc5	0.0548609	0	0.0120935	0.0273083	0	0.029894		0	0	0.0315479	0	0.0135433	0		0	0	0	0	0	0		0	0	0	0	0	0
3864.92	NeuAc2Fuc1Hex7HexNAc6	0	0.0127524	0.0249019	0	0	0		0	0.0147435	0	0	0	0		0.0558408	0	0	0	0	0		0	0.0249192	0	0.0134834	0	0
3894.94	NeuAc2Hex8HexNAc6	0	0.00311685	0	0	0	0		0	0	0.0381183	0	0	0		0.0640804	0.0358813	0	0	0	0		0	0	0	0	0	0
	sum	48.2585	52.3839	60.9072	63.8408	61.7332	61.8161	0	29.7356	34.6912	36.6684	46.0479	47.5666	52.598	0	46.8498	46.8041	45.2191	47.1405	39.6875	38.7336	0	48.3302	52.2834	31.6151	38.7724	36.3568	50.368
		high-mannose glycans (Man3GlcNAc2-Man9GlcNAc2)
		complex-type glycans (carrying antennae that extend the core and are initiated by GlcNAc on each antennae)
		fucosylated structures (all complex-type structures carrying fucose)
		sialylated structures (all complex-type structures carrying sialic acid (NeuGc and NeuAc))
